# Supplementary material for: In Silico Identification of Promising New Pyrazole Derivative-Based Small Molecules for Modulating CRMP2, C-RAF, CYP17, VEGFR, C-KIT, and HDAC—Application towards Cancer Therapeutics
Source: MDPI journal article supplement (doi:10.3390/cimb44110361), 2022-10-31
Supplement: s1 [file s1]

## ***Supplementary Information***

# **In Silico Identification of Promising New Pyrazole Derivative-Based Small Molecules for Modulating CRMP2, C-RAF, CYP17, VEGFR, C-KIT, and HDAC—Application towards Cancer Therapeutics**

**Fatima Ezzahra Bennani <sup>1,2,\*</sup>, Khalid Karrouchi <sup>3</sup>, Latifa Doudach <sup>4</sup>, Mario Scrima <sup>5,\*</sup>,  
Noor Rahman <sup>6</sup>, Luca Rastrelli <sup>7</sup>, Trina Ekawati Tallei <sup>8</sup>, Christopher E. Rudd <sup>2,9,10,†</sup>,  
My El Abbes Faouzi <sup>1,†</sup> and M'hammed Ansar <sup>11,†</sup>**

<sup>1</sup> Laboratory of Pharmacology and Toxicology, Bio Pharmaceutical and Toxicological Analysis Research Team, Faculty of Medicine and Pharmacy, Mohammed V University in Rabat, Rabat BP6203, Morocco

<sup>2</sup> Division of Immunology-Oncology, Centre de Recherche Hôpital Maisonneuve-Rosemont (CR-HMR), Montreal, QC H1T 2M4, Canada

<sup>3</sup> Laboratory of Analytical Chemistry, Faculty of Medicine and Pharmacy, Mohammed V University in Rabat, Rabat BP6203, Morocco

<sup>4</sup> Department of Biomedical Engineering Medical Physiology, Higher School of Technical Education of Rabat, Mohammed V University in Rabat, Rabat BP6203, Morocco

<sup>5</sup> Biogem Scarl, Via Camporeale, 83031 Ariano Irpino, AV, Italy

<sup>6</sup> Department of Biochemistry, Abdul Wali Khan University Mardan, Mardan 23200, Pakistan

<sup>7</sup> Dipartimento di Farmacia, University of Salerno, Via Giovanni Paolo II, 84084 Fisciano, SA, Italy

<sup>8</sup> Department of Biology, Faculty of Mathematics and Natural Sciences, Sam Ratulangi University, Manado 95115, North Sulawesi, Indonesia

<sup>9</sup> Department of Microbiology, Infection and Immunology, Faculty of Medicine, Université de Montreal, Montreal, QC H3T 1J4, Canada

<sup>10</sup> Division of Experimental Medicine, Department of Medicine, McGill University Health Center, McGill University, Montreal, QC H4A 3J1, Canada

<sup>11</sup> Laboratory of Medicinal Chemistry, Faculty of Medicine and Pharmacy, Mohammed V University in Rabat, Rabat BP6203, Morocco

\* Correspondence: bennani.fatima.ezzahra@gmail.com (F.E.B.); marioscrima@gmail.com (M.S.)

† These authors contributed equally to this work.

**Table S1.** Molecular docking based binding affinity of all 63 pyrazoles derivatives with CRMP2 (PDB ID: 6JV9) protein.

|                                                         | Protein-Pdb ID  | Binding Affinity K/Mol |
|---------------------------------------------------------|-----------------|------------------------|
| <b>All pyrazole derivatives series<br/>63 Molecules</b> | CRMP2_6JV9__M47 | -7                     |
|                                                         | CRMP2_6JV9__M74 | -6,9                   |
|                                                         | CRMP2_6JV9__M33 | -6,8                   |
|                                                         | CRMP2_6JV9__M72 | -6,8                   |
|                                                         | CRMP2_6JV9__M77 | -6,8                   |
|                                                         | CRMP2_6JV9__M79 | -6,8                   |
|                                                         | CRMP2_6JV9__M25 | -6,7                   |
|                                                         | CRMP2_6JV9__M76 | -6,7                   |
|                                                         | CRMP2_6JV9__M78 | -6,6                   |
|                                                         | CRMP2_6JV9__M73 | -6,5                   |
|                                                         | CRMP2_6JV9__M69 | -6,4                   |
|                                                         | CRMP2_6JV9__M28 | -6,3                   |
|                                                         | CRMP2_6JV9__M36 | -6,3                   |
|                                                         | CRMP2_6JV9__M71 | -6,3                   |
|                                                         | CRMP2_6JV9__M24 | -6,2                   |
|                                                         | CRMP2_6JV9__M31 | -6,2                   |
|                                                         | CRMP2_6JV9__M27 | -6,1                   |
|                                                         | CRMP2_6JV9__M34 | -6,1                   |
|                                                         | CRMP2_6JV9__M22 | -6                     |
|                                                         | CRMP2_6JV9__M26 | -6                     |
|                                                         | CRMP2_6JV9__M29 | -6                     |
|                                                         | CRMP2_6JV9__M32 | -6                     |
|                                                         | CRMP2_6JV9__M75 | -6                     |
|                                                         | CRMP2_6JV9__M83 | -6                     |
|                                                         | CRMP2_6JV9__M21 | -5,9                   |
|                                                         | CRMP2_6JV9__M23 | -5,9                   |
|                                                         | CRMP2_6JV9__M42 | -5,8                   |
|                                                         | CRMP2_6JV9__M67 | -5,8                   |
|                                                         | CRMP2_6JV9__M59 | -5,7                   |
|                                                         | CRMP2_6JV9__M63 | -5,7                   |
|                                                         | CRMP2_6JV9__M64 | -5,7                   |
|                                                         | CRMP2_6JV9__M54 | -5,6                   |
|                                                         | CRMP2_6JV9__M13 | -5,5                   |
|                                                         | CRMP2_6JV9__M7  | -5,5                   |
|                                                         | CRMP2_6JV9__M12 | -5,4                   |
|                                                         | CRMP2_6JV9__M18 | -5,4                   |
|                                                         | CRMP2_6JV9__M10 | -5,3                   |

|                           |                           |      |
|---------------------------|---------------------------|------|
|                           | CRMP2_6JV9_M11            | -5,3 |
|                           | CRMP2_6JV9_M15            | -5,3 |
|                           | CRMP2_6JV9_M16            | -5,3 |
|                           | CRMP2_6JV9_M17            | -5,3 |
|                           | CRMP2_6JV9_M19            | -5,3 |
|                           | CRMP2_6JV9_M20            | -5,3 |
|                           | CRMP2_6JV9_M8             | -5,3 |
|                           | CRMP2_6JV9_M9             | -5,3 |
|                           | CRMP2_6JV9_M14            | -5,2 |
|                           | CRMP2_6JV9_M82            | -5,2 |
|                           | CRMP2_6JV9_M39            | -4,9 |
|                           | CRMP2_6JV9_M41            | -4,7 |
|                           | CRMP2_6JV9_M48            | -4,7 |
|                           | CRMP2_6JV9_M86            | -4,7 |
|                           | CRMP2_6JV9_M44            | -4,6 |
|                           | CRMP2_6JV9_M53            | -4,6 |
|                           | CRMP2_6JV9_M56            | -4,6 |
|                           | CRMP2_6JV9_M37            | -4,5 |
|                           | CRMP2_6JV9_M43            | -4,5 |
|                           | CRMP2_6JV9_M50            | -4,5 |
|                           | CRMP2_6JV9_M40            | -4,4 |
|                           | CRMP2_6JV9_M38            | -4,3 |
|                           | CRMP2_6JV9_M45            | -4,2 |
|                           | CRMP2_6JV9_M46            | -4,2 |
|                           | CRMP2_6JV9_M49            | -4,2 |
|                           | CRMP2_6JV9_M3             | -4,1 |
| <b>Standars Activator</b> | CRMP2_6JV9_nalidixic_acid | -5   |

**Table S2.** Molecular docking based binding affinity of all 63 pyrazoles derivatives with E-RAF (PDB ID:3OMV) protein

|                                                         | Protein-Pdb ID | Binding Affinity K/Mol |
|---------------------------------------------------------|----------------|------------------------|
| <b>All pyrazole derivatives series<br/>63 Molecules</b> | E-RAF_3OMV_M36 | -9,7                   |
|                                                         | E-RAF_3OMV_M76 | -9,6                   |
|                                                         | E-RAF_3OMV_M78 | -9,6                   |
|                                                         | E-RAF_3OMV_M21 | -9,5                   |
|                                                         | E-RAF_3OMV_M33 | -9,4                   |
|                                                         | E-RAF_3OMV_M74 | -9,3                   |
|                                                         | E-RAF_3OMV_M77 | -9,3                   |
|                                                         | E-RAF_3OMV_M26 | -9,2                   |
|                                                         | E-RAF_3OMV_M72 | -9,2                   |
|                                                         | E-RAF_3OMV_M27 | -9                     |

|  |                 |      |
|--|-----------------|------|
|  | E-RAF_3OMV__M31 | -9   |
|  | E-RAF_3OMV__M47 | -9   |
|  | E-RAF_3OMV__M22 | -8,9 |
|  | E-RAF_3OMV__M24 | -8,9 |
|  | E-RAF_3OMV__M34 | -8,9 |
|  | E-RAF_3OMV__M42 | -8,9 |
|  | E-RAF_3OMV__M32 | -8,8 |
|  | E-RAF_3OMV__M28 | -8,7 |
|  | E-RAF_3OMV__M83 | -8,7 |
|  | E-RAF_3OMV__M23 | -8,5 |
|  | E-RAF_3OMV__M25 | -8,5 |
|  | E-RAF_3OMV__M29 | -8,5 |
|  | E-RAF_3OMV__M75 | -8,5 |
|  | E-RAF_3OMV__M16 | -8,4 |
|  | E-RAF_3OMV__M12 | -8,3 |
|  | E-RAF_3OMV__M18 | -8,3 |
|  | E-RAF_3OMV__M54 | -8,3 |
|  | E-RAF_3OMV__M10 | -8,2 |
|  | E-RAF_3OMV__M11 | -8,2 |
|  | E-RAF_3OMV__M17 | -8,2 |
|  | E-RAF_3OMV__M20 | -8,2 |
|  | E-RAF_3OMV__M8  | -8,2 |
|  | E-RAF_3OMV__M15 | -8,1 |
|  | E-RAF_3OMV__M19 | -8,1 |
|  | E-RAF_3OMV__M63 | -8,1 |
|  | E-RAF_3OMV__M64 | -8,1 |
|  | E-RAF_3OMV__M7  | -8,1 |
|  | E-RAF_3OMV__M50 | -8   |
|  | E-RAF_3OMV__M73 | -8   |
|  | E-RAF_3OMV__M9  | -8   |
|  | E-RAF_3OMV__M13 | -7,9 |
|  | E-RAF_3OMV__M59 | -7,8 |
|  | E-RAF_3OMV__M48 | -7,7 |
|  | E-RAF_3OMV__M79 | -7,7 |
|  | E-RAF_3OMV__M37 | -7,6 |
|  | E-RAF_3OMV__M41 | -7,6 |
|  | E-RAF_3OMV__M69 | -7,6 |
|  | E-RAF_3OMV__M71 | -7,6 |
|  | E-RAF_3OMV__M40 | -7,5 |
|  | E-RAF_3OMV__M45 | -7,5 |
|  | E-RAF_3OMV__M39 | -7,4 |
|  | E-RAF_3OMV__M44 | -7,4 |
|  | E-RAF_3OMV__M46 | -7,2 |
|  | E-RAF_3OMV__M49 | -7,2 |
|  | E-RAF_3OMV__M14 | -7,1 |
|  | E-RAF_3OMV__M38 | -7,1 |

|                           |                       |       |
|---------------------------|-----------------------|-------|
|                           | E-RAF_3OMV__M82       | -7    |
|                           | E-RAF_3OMV__M43       | -6,9  |
|                           | E-RAF_3OMV__M56       | -6,7  |
|                           | E-RAF_3OMV__M67       | -6,4  |
|                           | E-RAF_3OMV__M53       | -5,9  |
|                           | E-RAF_3OMV__M86       | -5,8  |
|                           | E-RAF_3OMV__M3        | -5,1  |
| <b>Standars Inhibitor</b> | E-RAF_3OMV__Sorafenib | -10,2 |

**Table S3.** Molecular docking based binding affinity of all 63 pyrazoles derivatives with CYP17 (PDB ID:4NKV) protein

|                                                         | <b>Protein-Pdb ID</b> | <b>Binding Affinity K/Mol</b> |
|---------------------------------------------------------|-----------------------|-------------------------------|
| <b>All pyrazole derivatives series<br/>63 Molecules</b> | CYP17_4NKV__M72       | -10,4                         |
|                                                         | CYP17_4NKV__M74       | -9,8                          |
|                                                         | CYP17_4NKV__M36       | -9,7                          |
|                                                         | CYP17_4NKV__M73       | -9,7                          |
|                                                         | CYP17_4NKV__M77       | -9,6                          |
|                                                         | CYP17_4NKV__M78       | -9,6                          |
|                                                         | CYP17_4NKV__M28       | -9,5                          |
|                                                         | CYP17_4NKV__M33       | -9,5                          |
|                                                         | CYP17_4NKV__M76       | -9,5                          |
|                                                         | CYP17_4NKV__M71       | -9,1                          |
|                                                         | CYP17_4NKV__M25       | -9                            |
|                                                         | CYP17_4NKV__M26       | -9                            |
|                                                         | CYP17_4NKV__M79       | -9                            |
|                                                         | CYP17_4NKV__M83       | -9                            |
|                                                         | CYP17_4NKV__M23       | -8,8                          |
|                                                         | CYP17_4NKV__M27       | -8,8                          |
|                                                         | CYP17_4NKV__M31       | -8,8                          |
|                                                         | CYP17_4NKV__M24       | -8,7                          |
|                                                         | CYP17_4NKV__M22       | -8,6                          |
|                                                         | CYP17_4NKV__M64       | -8,6                          |
|                                                         | CYP17_4NKV__M69       | -8,6                          |
|                                                         | CYP17_4NKV__M32       | -8,5                          |
|                                                         | CYP17_4NKV__M34       | -8,5                          |
|                                                         | CYP17_4NKV__M63       | -8,4                          |
|                                                         | CYP17_4NKV__M21       | -8,3                          |
|                                                         | CYP17_4NKV__M29       | -8,2                          |
|                                                         | CYP17_4NKV__M75       | -8,2                          |
|                                                         | CYP17_4NKV__M40       | -7,9                          |
|                                                         | CYP17_4NKV__M11       | -7,8                          |
|                                                         | CYP17_4NKV__M59       | -7,8                          |
|                                                         | CYP17_4NKV__M67       | -7,7                          |

|                    |                                     |       |
|--------------------|-------------------------------------|-------|
|                    | CYP17_4NKV__M12                     | -7,6  |
|                    | CYP17_4NKV__M46                     | -7,6  |
|                    | CYP17_4NKV__M48                     | -7,6  |
|                    | CYP17_4NKV__M38                     | -7,5  |
|                    | CYP17_4NKV__M42                     | -7,5  |
|                    | CYP17_4NKV__M45                     | -7,5  |
|                    | CYP17_4NKV__M54                     | -7,5  |
|                    | CYP17_4NKV__M7                      | -7,5  |
|                    | CYP17_4NKV__M13                     | -7,4  |
|                    | CYP17_4NKV__M20                     | -7,4  |
|                    | CYP17_4NKV__M43                     | -7,4  |
|                    | CYP17_4NKV__M10                     | -7,3  |
|                    | CYP17_4NKV__M15                     | -7,3  |
|                    | CYP17_4NKV__M16                     | -7,3  |
|                    | CYP17_4NKV__M18                     | -7,3  |
|                    | CYP17_4NKV__M37                     | -7,3  |
|                    | CYP17_4NKV__M41                     | -7,3  |
|                    | CYP17_4NKV__M49                     | -7,1  |
|                    | CYP17_4NKV__M50                     | -7,1  |
|                    | CYP17_4NKV__M8                      | -7,1  |
|                    | CYP17_4NKV__M17                     | -7    |
|                    | CYP17_4NKV__M39                     | -7    |
|                    | CYP17_4NKV__M9                      | -7    |
|                    | CYP17_4NKV__M14                     | -6,9  |
|                    | CYP17_4NKV__M19                     | -6,9  |
|                    | CYP17_4NKV__M82                     | -6,9  |
|                    | CYP17_4NKV__M44                     | -6,8  |
|                    | CYP17_4NKV__M56                     | -6    |
|                    | CYP17_4NKV__M53                     | -5,6  |
|                    | CYP17_4NKV__M86                     | -5,6  |
|                    | CYP17_4NKV__M3                      | -5,1  |
|                    | CYP17_4NKV__M47                     | -3,7  |
| Standars Inhibitor | CYP17_4NKV__Galeterone              | -11,6 |
|                    | CYP17_4NKV__Abiraterone<br>_acetate | -9,7  |
|                    | CYP17_4NKV__Orteronel               | -8,7  |

**Table S4.** Molecular docking based binding affinity of all 63 pyrazoles derivatives with VEGFR (PDB ID:4AGD) protein

|                                                         | Protein-Pdb ID  | Binding Affinity K/Mol |
|---------------------------------------------------------|-----------------|------------------------|
| <b>All pyrazole derivatives series<br/>63 Molecules</b> | VEGFR_4AGD__M72 | -9,2                   |
|                                                         | VEGFR_4AGD__M76 | -9,2                   |
|                                                         | VEGFR_4AGD__M25 | -9,1                   |
|                                                         | VEGFR_4AGD__M78 | -9,1                   |
|                                                         | VEGFR_4AGD__M26 | -9                     |
|                                                         | VEGFR_4AGD__M27 | -9                     |
|                                                         | VEGFR_4AGD__M73 | -9                     |
|                                                         | VEGFR_4AGD__M33 | -8,9                   |
|                                                         | VEGFR_4AGD__M77 | -8,9                   |
|                                                         | VEGFR_4AGD__M83 | -8,9                   |
|                                                         | VEGFR_4AGD__M22 | -8,8                   |
|                                                         | VEGFR_4AGD__M31 | -8,8                   |
|                                                         | VEGFR_4AGD__M32 | -8,8                   |
|                                                         | VEGFR_4AGD__M34 | -8,8                   |
|                                                         | VEGFR_4AGD__M69 | -8,8                   |
|                                                         | VEGFR_4AGD__M74 | -8,8                   |
|                                                         | VEGFR_4AGD__M54 | -8,7                   |
|                                                         | VEGFR_4AGD__M23 | -8,6                   |
|                                                         | VEGFR_4AGD__M28 | -8,6                   |
|                                                         | VEGFR_4AGD__M36 | -8,6                   |
|                                                         | VEGFR_4AGD__M24 | -8,5                   |
|                                                         | VEGFR_4AGD__M29 | -8,5                   |
|                                                         | VEGFR_4AGD__M64 | -8,4                   |
|                                                         | VEGFR_4AGD__M79 | -8,2                   |
|                                                         | VEGFR_4AGD__M20 | -8,1                   |
|                                                         | VEGFR_4AGD__M42 | -8                     |
|                                                         | VEGFR_4AGD__M75 | -8                     |
|                                                         | VEGFR_4AGD__M59 | -7,9                   |
|                                                         | VEGFR_4AGD__M63 | -7,9                   |
|                                                         | VEGFR_4AGD__M71 | -7,9                   |
|                                                         | VEGFR_4AGD__M47 | -7,9                   |
|                                                         | VEGFR_4AGD__M10 | -7,7                   |
|                                                         | VEGFR_4AGD__M12 | -7,7                   |
|                                                         | VEGFR_4AGD__M13 | -7,7                   |
|                                                         | VEGFR_4AGD__M16 | -7,7                   |
|                                                         | VEGFR_4AGD__M18 | -7,7                   |
|                                                         | VEGFR_4AGD__M21 | -7,7                   |
|                                                         | VEGFR_4AGD__M11 | -7,6                   |
|                                                         | VEGFR_4AGD__M45 | -7,6                   |
|                                                         | VEGFR_4AGD__M9  | -7,5                   |

|                           |                       |      |
|---------------------------|-----------------------|------|
|                           | VEGFR_4AGD__M17       | -7,4 |
|                           | VEGFR_4AGD__M19       | -7,4 |
|                           | VEGFR_4AGD__M39       | -7,4 |
|                           | VEGFR_4AGD__M40       | -7,4 |
|                           | VEGFR_4AGD__M46       | -7,4 |
|                           | VEGFR_4AGD__M7        | -7,4 |
|                           | VEGFR_4AGD__M82       | -7,4 |
|                           | VEGFR_4AGD__M15       | -7,3 |
|                           | VEGFR_4AGD__M37       | -7,2 |
|                           | VEGFR_4AGD__M8        | -7,2 |
|                           | VEGFR_4AGD__M49       | -7,1 |
|                           | VEGFR_4AGD__M38       | -7   |
|                           | VEGFR_4AGD__M14       | -6,9 |
|                           | VEGFR_4AGD__M50       | -6,9 |
|                           | VEGFR_4AGD__M41       | -6,8 |
|                           | VEGFR_4AGD__M53       | -6,6 |
|                           | VEGFR_4AGD__M48       | -6,5 |
|                           | VEGFR_4AGD__M67       | -6,4 |
|                           | VEGFR_4AGD__M86       | -6,4 |
|                           | VEGFR_4AGD__M43       | -6,3 |
|                           | VEGFR_4AGD__M44       | -6,2 |
|                           | VEGFR_4AGD__M56       | -6,1 |
|                           | VEGFR_4AGD__M3        | -5,6 |
| <b>Standars Inhibitor</b> | protein2\r_Sunitinib  | -10  |
|                           | Sorafenib mst be dock |      |

**Table S5.** Molecular docking based binding affinity of all 63 pyrazoles derivatives with C-KIT (PDB ID:6XVB) protein

|                                                             | Protein-Pdb ID | Binding Affinity<br>K/Mol |
|-------------------------------------------------------------|----------------|---------------------------|
| <b>All pyrazole<br/>derivatives series<br/>63 Molecules</b> | C-KIT_6XVB_M74 | -9,2                      |
|                                                             | C-KIT_6XVB_M72 | -9,1                      |
|                                                             | C-KIT_6XVB_M75 | -9,1                      |
|                                                             | C-KIT_6XVB_M76 | -9,1                      |
|                                                             | C-KIT_6XVB_M78 | -9,1                      |
|                                                             | C-KIT_6XVB_M77 | -8,9                      |
|                                                             | C-KIT_6XVB_M27 | -8,8                      |
|                                                             | C-KIT_6XVB_M69 | -8,8                      |
|                                                             | C-KIT_6XVB_M26 | -8,7                      |
|                                                             | C-KIT_6XVB_M31 | -8,7                      |
|                                                             | C-KIT_6XVB_M32 | -8,7                      |
|                                                             | C-KIT_6XVB_M34 | -8,7                      |
|                                                             | C-KIT_6XVB_M25 | -8,6                      |
|                                                             | C-KIT_6XVB_M47 | -8,6                      |



|  |                |      |
|--|----------------|------|
|  | C-KIT_6XVB_M71 | -8,6 |
|  | C-KIT_6XVB_M22 | -8,5 |
|  | C-KIT_6XVB_M28 | -8,5 |
|  | C-KIT_6XVB_M79 | -8,5 |
|  | C-KIT_6XVB_M23 | -8,4 |
|  | C-KIT_6XVB_M33 | -8,4 |
|  | C-KIT_6XVB_M29 | -8,3 |
|  | C-KIT_6XVB_M83 | -8,3 |
|  | C-KIT_6XVB_M36 | -8,2 |
|  | C-KIT_6XVB_M73 | -8,1 |
|  | C-KIT_6XVB_M40 | -8   |
|  | C-KIT_6XVB_M24 | -7,9 |
|  | C-KIT_6XVB_M63 | -7,9 |
|  | C-KIT_6XVB_M21 | -7,8 |
|  | C-KIT_6XVB_M64 | -7,8 |
|  | C-KIT_6XVB_M67 | -7,8 |
|  | C-KIT_6XVB_M39 | -7,7 |
|  | C-KIT_6XVB_M48 | -7,7 |
|  | C-KIT_6XVB_M20 | -7,6 |
|  | C-KIT_6XVB_M38 | -7,6 |
|  | C-KIT_6XVB_M41 | -7,6 |
|  | C-KIT_6XVB_M43 | -7,6 |
|  | C-KIT_6XVB_M7  | -7,6 |
|  | C-KIT_6XVB_M11 | -7,5 |
|  | C-KIT_6XVB_M13 | -7,5 |
|  | C-KIT_6XVB_M16 | -7,5 |
|  | C-KIT_6XVB_M45 | -7,5 |
|  | C-KIT_6XVB_M54 | -7,5 |
|  | C-KIT_6XVB_M59 | -7,5 |
|  | C-KIT_6XVB_M10 | -7,4 |
|  | C-KIT_6XVB_M15 | -7,4 |
|  | C-KIT_6XVB_M18 | -7,4 |
|  | C-KIT_6XVB_M42 | -7,4 |
|  | C-KIT_6XVB_M46 | -7,4 |
|  | C-KIT_6XVB_M49 | -7,4 |
|  | C-KIT_6XVB_M12 | -7,3 |
|  | C-KIT_6XVB_M17 | -7,3 |
|  | C-KIT_6XVB_M37 | -7,3 |
|  | C-KIT_6XVB_M19 | -7,2 |
|  | C-KIT_6XVB_M9  | -7,2 |
|  | C-KIT_6XVB_M44 | -7,1 |
|  | C-KIT_6XVB_M8  | -7,1 |
|  | C-KIT_6XVB_M14 | -6,9 |
|  | C-KIT_6XVB_M82 | -6,9 |
|  | C-KIT_6XVB_M50 | -6,4 |
|  | C-KIT_6XVB_M56 | -6,1 |

|                           |                       |      |
|---------------------------|-----------------------|------|
|                           | C-KIT_6XVB_M86        | -5,9 |
|                           | C-KIT_6XVB_M53        | -5,8 |
|                           | C-KIT_6XVB_M3         | -5,3 |
| <b>Standars Inhibitor</b> | protein4\r_Sunitinib  | -7,9 |
|                           | Sorafenib mst be dock |      |

**Table S6.** Molecular docking based binding affinity of all 63 pyrazoles derivatives with HDAC (PDB ID:3ZNR) protein

|                                                         | <b>Protein-Pdb ID</b> | <b>Binding Affinity K/Mol</b> |
|---------------------------------------------------------|-----------------------|-------------------------------|
| <b>All pyrazole derivatives series<br/>63 Molecules</b> | HDAC_3ZNR_M33         | -10,1                         |
|                                                         | HDAC_3ZNR_M83         | -9,7                          |
|                                                         | HDAC_3ZNR_M25         | -9,6                          |
|                                                         | HDAC_3ZNR_M23         | -9,4                          |
|                                                         | HDAC_3ZNR_M21         | -9                            |
|                                                         | HDAC_3ZNR_M40         | -8,8                          |
|                                                         | HDAC_3ZNR_M72         | -8,8                          |
|                                                         | HDAC_3ZNR_M28         | -8,7                          |
|                                                         | HDAC_3ZNR_M36         | -8,7                          |
|                                                         | HDAC_3ZNR_M74         | -8,6                          |
|                                                         | HDAC_3ZNR_M76         | -8,5                          |
|                                                         | HDAC_3ZNR_M78         | -8,5                          |
|                                                         | HDAC_3ZNR_M77         | -8,4                          |
|                                                         | HDAC_3ZNR_M79         | -8,4                          |
|                                                         | HDAC_3ZNR_M82         | -8,4                          |
|                                                         | HDAC_3ZNR_M63         | -8,3                          |
|                                                         | HDAC_3ZNR_M64         | -8,2                          |
|                                                         | HDAC_3ZNR_M69         | -8,1                          |
|                                                         | HDAC_3ZNR_M73         | -8,1                          |
|                                                         | HDAC_3ZNR_M24         | -8                            |
|                                                         | HDAC_3ZNR_M48         | -8                            |
|                                                         | HDAC_3ZNR_M50         | -8                            |
|                                                         | HDAC_3ZNR_M54         | -8                            |
|                                                         | HDAC_3ZNR_M59         | -8                            |
|                                                         | HDAC_3ZNR_M41         | -7,9                          |
|                                                         | HDAC_3ZNR_M43         | -7,9                          |
|                                                         | HDAC_3ZNR_M45         | -7,9                          |
|                                                         | HDAC_3ZNR_M38         | -7,8                          |
|                                                         | HDAC_3ZNR_M46         | -7,8                          |
|                                                         | HDAC_3ZNR_M37         | -7,7                          |
|                                                         | HDAC_3ZNR_M39         | -7,7                          |
|                                                         | HDAC_3ZNR_M42         | -7,7                          |
|                                                         | HDAC_3ZNR_M49         | -7,7                          |

|                    |                  |       |
|--------------------|------------------|-------|
|                    | HDAC_3ZNR_M71    | -7,7  |
|                    | HDAC_3ZNR_M75    | -7,7  |
|                    | HDAC_3ZNR_M13    | -7,6  |
|                    | HDAC_3ZNR_M20    | -7,6  |
|                    | HDAC_3ZNR_M26    | -7,6  |
|                    | HDAC_3ZNR_M44    | -7,5  |
|                    | HDAC_3ZNR_M47    | -7,5  |
|                    | HDAC_3ZNR_M67    | -7,5  |
|                    | HDAC_3ZNR_M11    | -7,4  |
|                    | HDAC_3ZNR_M10    | -7,3  |
|                    | HDAC_3ZNR_M22    | -7,3  |
|                    | HDAC_3ZNR_M15    | -7,2  |
|                    | HDAC_3ZNR_M16    | -7,2  |
|                    | HDAC_3ZNR_M17    | -7,2  |
|                    | HDAC_3ZNR_M18    | -7,2  |
|                    | HDAC_3ZNR_M19    | -7,2  |
|                    | HDAC_3ZNR_M27    | -7,2  |
|                    | HDAC_3ZNR_M7     | -7,2  |
|                    | HDAC_3ZNR_M29    | -7,1  |
|                    | HDAC_3ZNR_M9     | -7,1  |
|                    | HDAC_3ZNR_M12    | -7    |
|                    | HDAC_3ZNR_M31    | -7    |
|                    | HDAC_3ZNR_M8     | -7    |
|                    | HDAC_3ZNR_M32    | -6,9  |
|                    | HDAC_3ZNR_M34    | -6,9  |
|                    | HDAC_3ZNR_M53    | -6,7  |
|                    | HDAC_3ZNR_M56    | -6,6  |
|                    | HDAC_3ZNR_M86    | -6,6  |
|                    | HDAC_3ZNR_M14    | -6,5  |
|                    | HDAC_3ZNR_M3     | -5,9  |
| Standars Inhibitor | HDAC_3ZNR_SAHA   | -7,6  |
|                    | HDAC_3ZNR_TMP269 | -10,3 |

**Table S7:** *In Silico* predicted Lipinski rule of five and veer's rule of all pyrazole compounds.

| Molecule | Lipinski rule of 5 |         |     |     |                       | Veber's Rule |              |                    |
|----------|--------------------|---------|-----|-----|-----------------------|--------------|--------------|--------------------|
|          | MW                 | LogP    | HBA | HBD | Lipinski's violations | NRB          | Surface area | Veber's violations |
| M3       | 140.146            | -0.8031 | 4   | 2   | Suitable              | 1            | 57.975       | Suitable           |
| M7       | 228.255            | 1.3573  | 3   | 4   | Suitable              | 1            | 98.953       | Suitable           |
| M8       | 258.281            | 1.3659  | 4   | 5   | Suitable              | 1            | 110.431      | Suitable           |
| M9       | 271.324            | 1.4233  | 4   | 5   | Suitable              | 1            | 117.443      | Suitable           |
| M10      | 273.252            | 1.2655  | 4   | 6   | Suitable              | 1            | 113.606      | Suitable           |

|     |         |         |   |   |          |   |         |          |
|-----|---------|---------|---|---|----------|---|---------|----------|
| M11 | 262.7   | 2.0107  | 3 | 4 | Suitable | 1 | 109.256 | Suitable |
| M12 | 297.145 | 2.6641  | 3 | 4 | Suitable | 1 | 119.559 | Suitable |
| M13 | 323.15  | 1.8254  | 3 | 5 | Suitable | 2 | 117.615 | Suitable |
| M14 | 218.216 | 0.9503  | 3 | 5 | Suitable | 1 | 91.747  | Suitable |
| M15 | 274.28  | 1.0715  | 6 | 2 | Suitable | 4 | 115.226 | Suitable |
| M16 | 242.282 | 1.66572 | 3 | 4 | Suitable | 1 | 105.318 | Suitable |
| M17 | 262.7   | 2.0107  | 3 | 4 | Suitable | 1 | 109.256 | Suitable |
| M18 | 246.245 | 1.4964  | 3 | 4 | Suitable | 1 | 103.118 | Suitable |
| M19 | 307.151 | 2.1198  | 3 | 4 | Suitable | 1 | 112.82  | Suitable |
| M20 | 242.282 | 1.7474  | 3 | 4 | Suitable | 1 | 105.318 | Suitable |
| M21 | 304.353 | 2.7758  | 4 | 4 | Suitable | 1 | 134.01  | Suitable |
| M22 | 290.326 | 2.3857  | 4 | 4 | Suitable | 1 | 127.645 | Suitable |
| M23 | 320.352 | 2.3943  | 5 | 5 | Suitable | 1 | 139.123 | Suitable |
| M24 | 333.395 | 2.4517  | 5 | 5 | Suitable | 1 | 146.135 | Suitable |
| M25 | 335.323 | 2.2939  | 5 | 6 | Suitable | 1 | 142.298 | Suitable |
| M26 | 324.771 | 3.0391  | 4 | 4 | Suitable | 1 | 137.948 | Suitable |
| M27 | 359.216 | 3.6925  | 4 | 4 | Suitable | 1 | 148.252 | Suitable |
| M28 | 385.221 | 2.8538  | 4 | 5 | Suitable | 2 | 146.307 | Suitable |
| M29 | 280.287 | 1.9787  | 4 | 5 | Suitable | 1 | 120.439 | Suitable |
| M31 | 304.353 | 2.69412 | 4 | 4 | Suitable | 1 | 134.01  | Suitable |
| M32 | 324.771 | 3.0391  | 4 | 4 | Suitable | 1 | 137.948 | Suitable |
| M33 | 308.316 | 2.5248  | 4 | 4 | Suitable | 1 | 131.811 | Suitable |
| M34 | 369.222 | 3.1482  | 4 | 4 | Suitable | 1 | 141.513 | Suitable |
| M36 | 366.424 | 3.8042  | 5 | 4 | Suitable | 1 | 162.702 | Suitable |
| M37 | 256.309 | 1.65024 | 4 | 4 | Suitable | 1 | 111.497 | Suitable |
| M38 | 286.335 | 1.65884 | 5 | 5 | Suitable | 1 | 122.976 | Suitable |
| M39 | 299.378 | 1.71624 | 5 | 5 | Suitable | 1 | 129.987 | Suitable |
| M40 | 301.306 | 1.55844 | 5 | 6 | Suitable | 1 | 126.15  | Suitable |
| M41 | 290.754 | 2.30364 | 4 | 4 | Suitable | 1 | 121.801 | Suitable |
| M42 | 325.199 | 2.95704 | 4 | 4 | Suitable | 1 | 132.104 | Suitable |
| M43 | 351.204 | 2.11834 | 4 | 5 | Suitable | 2 | 130.159 | Suitable |
| M44 | 246.27  | 1.24324 | 4 | 5 | Suitable | 1 | 104.292 | Suitable |
| M45 | 270.336 | 1.95866 | 4 | 4 | Suitable | 1 | 117.862 | Suitable |
| M46 | 290.754 | 2.30364 | 4 | 4 | Suitable | 1 | 121.801 | Suitable |
| M47 | 274.299 | 1.78934 | 4 | 4 | Suitable | 1 | 115.663 | Suitable |
| M48 | 302.334 | 1.36444 | 5 | 6 | Suitable | 2 | 127.77  | Suitable |
| M49 | 335.205 | 2.41274 | 4 | 4 | Suitable | 1 | 125.365 | Suitable |
| M50 | 270.336 | 2.04034 | 4 | 4 | Suitable | 1 | 117.862 | Suitable |
| M53 | 196.239 | -0.1507 | 1 | 7 | Suitable | 2 | 79.938  | Suitable |
| M54 | 258.31  | 0.8777  | 2 | 7 | Suitable | 2 | 108.63  | Suitable |

|     |         |         |   |   |          |   |         |          |
|-----|---------|---------|---|---|----------|---|---------|----------|
| M56 | 224.293 | 0.14224 | 2 | 7 | Suitable | 2 | 92.483  | Suitable |
| M59 | 327.417 | 2.0837  | 4 | 8 | Suitable | 1 | 139.405 | Suitable |
| M63 | 379.243 | 2.4858  | 3 | 8 | Suitable | 2 | 139.577 | Suitable |
| M64 | 298.375 | 2.32612 | 3 | 7 | Suitable | 1 | 127.281 | Suitable |
| M67 | 330.373 | 1.7319  | 4 | 9 | Suitable | 2 | 137.188 | Suitable |
| M69 | 346.419 | 3.0461  | 4 | 7 | Suitable | 1 | 149.608 | Suitable |
| M71 | 389.488 | 3.1121  | 5 | 8 | Suitable | 1 | 168.097 | Suitable |
| M72 | 380.864 | 3.6995  | 4 | 7 | Suitable | 1 | 159.911 | Suitable |
| M73 | 415.309 | 4.3529  | 4 | 7 | Suitable | 1 | 170.214 | Suitable |
| M74 | 441.314 | 3.5142  | 4 | 8 | Suitable | 2 | 168.269 | Suitable |
| M75 | 336.38  | 2.6391  | 4 | 8 | Suitable | 1 | 142.402 | Suitable |
| M76 | 360.446 | 3.35452 | 4 | 7 | Suitable | 1 | 155.973 | Suitable |
| M77 | 380.864 | 3.6995  | 4 | 7 | Suitable | 1 | 159.911 | Suitable |
| M78 | 364.409 | 3.1852  | 4 | 7 | Suitable | 1 | 153.773 | Suitable |
| M79 | 425.315 | 3.8086  | 4 | 7 | Suitable | 1 | 163.475 | Suitable |
| M82 | 241.254 | 1.1293  | 2 | 5 | Suitable | 1 | 102.692 | Suitable |
| M83 | 303.325 | 2.1577  | 3 | 5 | Suitable | 1 | 131.384 | Suitable |
| M86 | 182.208 | 0.927   | 1 | 6 | Suitable | 1 | 74.003  | Suitable |

MW = molecular weight; LogP = lipohilicity; HBA = hydrogen bond acceptor  
HBD = hydrogen bond donor; NRB = number of rotatable bonds

**Table S8:** Predicted absorption profile of all pyrazole derivatives

| ABSORPTION |                  |                    |                               |                   |                          |                            |                             |
|------------|------------------|--------------------|-------------------------------|-------------------|--------------------------|----------------------------|-----------------------------|
| Molecule   | Water solubility | Caco2 permeability | Intestinal absorption (human) | Skin Permeability | P-glycoprotein substrate | P-glycoprotein I inhibitor | P-glycoprotein II inhibitor |
| M3         | -0.954           | 0.59               | 83.582                        | -4.22             | -                        | -                          | -                           |
| M7         | -2.286           | 0.787              | 94.084                        | -2.722            | -                        | -                          | -                           |
| M8         | -2.884           | 0.564              | 94.428                        | -3.146            | -                        | -                          | -                           |
| M9         | -2.989           | 0.67               | 94.665                        | -3.135            | -                        | -                          | -                           |
| M10        | -3.049           | -0.073             | 83.589                        | -2.625            | -                        | -                          | -                           |
| M11        | -3.214           | 0.833              | 92.607                        | -2.983            | -                        | -                          | -                           |
| M12        | -4.146           | 0.864              | 90.946                        | -2.67             | -                        | -                          | -                           |
| M13        | -3.497           | 0.989              | 90.823                        | -3.338            | -                        | -                          | -                           |
| M14        | -2.592           | 0.753              | 90.184                        | -3.628            | -                        | -                          | -                           |
| M15        | -3.193           | 0.039              | 77.005                        | -3.534            | -                        | -                          | -                           |
| M16        | -2.891           | 0.843              | 94.065                        | -2.738            | -                        | -                          | -                           |
| M17        | -3.119           | 0.843              | 92.423                        | -2.662            | -                        | -                          | -                           |
| M18        | -2.399           | 0.794              | 93.325                        | -2.853            | -                        | -                          | -                           |
| M19        | -3.256           | 0.838              | 92.356                        | -2.654            | -                        | -                          | -                           |
| M20        | -2.758           | 0.851              | 93.879                        | -2.998            | -                        | -                          | -                           |

|     |        |        |        |        |   |   |   |
|-----|--------|--------|--------|--------|---|---|---|
| M21 | -4.37  | 1.09   | 94.932 | -2.975 | - | + | - |
| M22 | -3.334 | 0.904  | 93.307 | -2.545 | - | - | - |
| M23 | -3.87  | 0.957  | 93.668 | -2.832 | - | + | - |
| M24 | -4.013 | 0.948  | 93.905 | -2.764 | + | + | - |
| M25 | -3.717 | -0.077 | 89.226 | -2.731 | - | + | - |
| M26 | -3.942 | 0.886  | 91.647 | -2.56  | - | + | - |
| M27 | -5.004 | 0.877  | 90.186 | -2.711 | + | + | - |
| M28 | -4.053 | 0.908  | 88.895 | -2.939 | + | + | - |
| M29 | -3.415 | 0.975  | 94.474 | -2.778 | - | - | - |
| M31 | -3.868 | 0.916  | 93.305 | -2.688 | - | + | - |
| M32 | -4.3   | 0.895  | 91.847 | -2.699 | - | + | - |
| M33 | -3.78  | 0.91   | 92.749 | -2.774 | - | + | - |
| M34 | -4.421 | 0.89   | 91.78  | -2.697 | - | + | - |
| M36 | -4.472 | 1.144  | 94.034 | -2.656 | - | + | + |
| M37 | -3.777 | 1.266  | 96.423 | -3.001 | - | - | - |
| M38 | -3.34  | 1.402  | 95.44  | -2.605 | - | - | - |
| M39 | -4.394 | 0.914  | 96.821 | -3.041 | - | - | - |
| M40 | -4.65  | 0.013  | 83.785 | -2.873 | - | - | - |
| M41 | -4.513 | 1.312  | 94.762 | -2.967 | - | - | - |
| M42 | -5.21  | 1.357  | 93.101 | -2.941 | - | - | - |
| M43 | -4.573 | 1.059  | 91.81  | -3.282 | - | - | - |
| M44 | -3.781 | 0.841  | 95.591 | -3.3   | - | - | - |
| M45 | -3.514 | 1.308  | 95.077 | -2.586 | - | - | - |
| M46 | -4.513 | 1.312  | 94.762 | -2.967 | - | - | - |
| M47 | -4.029 | 1.279  | 95.664 | -3.101 | - | - | - |
| M48 | -3.14  | 1.411  | 94.581 | -3.02  | + | - | - |
| M49 | -4.621 | 1.317  | 94.695 | -2.955 | - | - | - |
| M50 | -4.078 | 1.289  | 96.034 | -2.956 | - | - | - |
| M53 | -2.962 | 0.644  | 100    | -2.899 | - | - | - |
| M54 | -2.919 | 0.645  | 71.418 | -3.186 | - | - | - |
| M56 | -2.99  | 1.216  | 100    | -2.748 | - | - | - |
| M59 | -4.09  | 1.006  | 94.136 | -2.882 | - | - | - |
| M63 | -3.749 | 1.257  | 91.928 | -3.049 | + | - | - |
| M64 | -3.892 | 0.982  | 93.462 | -2.856 | - | - | - |
| M67 | -4.238 | -0.14  | 83.813 | -3.272 | + | - | - |
| M69 | -4.885 | 1.185  | 94.088 | -2.864 | - | + | - |
| M71 | -4.686 | 1.007  | 93.193 | -2.936 | - | + | + |
| M72 | -4.969 | 0.953  | 91.145 | -2.878 | - | + | + |
| M73 | -5.526 | 0.548  | 89.473 | -2.868 | - | + | + |
| M74 | -4.813 | 0.964  | 88.182 | -2.986 | - | + | + |
| M75 | -4.841 | 1.108  | 93.828 | -2.969 | - | - | - |
| M76 | -4.527 | 0.976  | 92.592 | -2.889 | - | + | + |
| M77 | -4.931 | 0.954  | 91.134 | -2.877 | - | + | + |
| M78 | -4.494 | 0.969  | 92.036 | -2.931 | - | + | + |
| M79 | -5.029 | 0.95   | 91.067 | -2.877 | - | + | + |
| M82 | -2.477 | 1.035  | 70.439 | -2.875 | - | - | - |

|     |        |       |       |        |   |   |   |
|-----|--------|-------|-------|--------|---|---|---|
| M83 | -3.347 | 0.786 | 93.58 | -2.736 | + | - | - |
| M86 | -3.094 | 0.654 | 100   | -3.25  | - | - | - |

**Table S9:** Predicted distribution profile of all pyrazole derivatives

| <b>DISTRIBUTION</b> |                                    |                                         |                             |                             |
|---------------------|------------------------------------|-----------------------------------------|-----------------------------|-----------------------------|
| <b>Molecules</b>    | <b>VDss<br/>(human) L<br/>kg-1</b> | <b>Fraction<br/>unbound<br/>(human)</b> | <b>BBB<br/>permeability</b> | <b>CNS<br/>permeability</b> |
| M3                  | -0.342                             | 0.772                                   | -0.17                       | -3.476                      |
| M7                  | 0.052                              | 0.364                                   | -0.178                      | -2.439                      |
| M8                  | -0.045                             | 0.34                                    | -0.412                      | -2.64                       |
| M9                  | 0.014                              | 0.328                                   | -0.22                       | -2.54                       |
| M10                 | 0.046                              | 0.206                                   | -0.728                      | -2.675                      |
| M11                 | -0.007                             | 0.313                                   | -0.054                      | -2.335                      |
| M12                 | 0.059                              | 0.298                                   | -0.036                      | -2.218                      |
| M13                 | -0.077                             | 0.379                                   | -0.431                      | -2.992                      |
| M14                 | -0.198                             | 0.595                                   | -0.373                      | -3.04                       |
| M15                 | -0.25                              | 0.439                                   | -0.527                      | -3.02                       |
| M16                 | 0.144                              | 0.36                                    | -0.022                      | -2.374                      |
| M17                 | 0.026                              | 0.32                                    | -0.067                      | -2.325                      |
| M18                 | -0.121                             | 0.36                                    | -0.168                      | -2.478                      |
| M19                 | 0.037                              | 0.312                                   | -0.069                      | -2.302                      |
| M20                 | 0.054                              | 0.327                                   | -0.04                       | -2.358                      |
| M21                 | -0.16                              | 0.167                                   | -0.097                      | -2.655                      |
| M22                 | 0.292                              | 0.123                                   | 0.011                       | -2.178                      |
| M23                 | -0.013                             | 0.013                                   | -0.344                      | -2.382                      |
| M24                 | 0.181                              | 0.037                                   | -0.28                       | -2.281                      |
| M25                 | 0.162                              | 0.017                                   | -0.655                      | -2.412                      |
| M26                 | 0.276                              | 0.089                                   | 0.011                       | -2.064                      |
| M27                 | 0.127                              | 0                                       | 0.017                       | -1.961                      |
| M28                 | -0.072                             | 0.048                                   | -0.55                       | -2.243                      |
| M29                 | 0.074                              | 0.339                                   | -0.335                      | -2.854                      |
| M31                 | 0.198                              | 0.038                                   | 0.031                       | -2.116                      |
| M32                 | 0.142                              | 0.022                                   | 0.018                       | -2.075                      |
| M33                 | -0.021                             | 0.053                                   | 0.011                       | -2.229                      |
| M34                 | 0.157                              | 0.016                                   | 0.016                       | -2.053                      |
| M36                 | 0.088                              | 0.008                                   | -0.046                      | -2.502                      |
| M37                 | -0.108                             | 0.416                                   | 0.018                       | -2.804                      |
| M38                 | -0.221                             | 0.183                                   | -0.49                       | -2.71                       |
| M39                 | -0.125                             | 0.384                                   | -0.029                      | -2.825                      |
| M40                 | -0.463                             | 0.319                                   | -0.7                        | -2.892                      |
| M41                 | -0.139                             | 0.371                                   | 0.017                       | -2.809                      |
| M42                 | -0.169                             | 0.325                                   | 0.016                       | -2.814                      |
| M43                 | -0.345                             | 0.39                                    | -0.573                      | -2.913                      |
| M44                 | -0.201                             | 0.57                                    | -0.357                      | -2.963                      |

|     |        |       |        |        |
|-----|--------|-------|--------|--------|
| M45 | 0      | 0.212 | 0.271  | -2.444 |
| M46 | -0.139 | 0.371 | 0.017  | -2.809 |
| M47 | -0.275 | 0.409 | 0.01   | -2.84  |
| M48 | -0.09  | 0.285 | -0.542 | -3.032 |
| M49 | -0.128 | 0.362 | 0.016  | -2.807 |
| M50 | -0.076 | 0.387 | 0.031  | -2.785 |
| M53 | 0.018  | 0.756 | -0.043 | -3.501 |
| M54 | -0.195 | 0.388 | -0.555 | -2.964 |
| M56 | 0.336  | 0.593 | -0.1   | -3.482 |
| M59 | 0.049  | 0.18  | -0.732 | -2.535 |
| M63 | 0.24   | 0.233 | -0.807 | -3.05  |
| M64 | 0.199  | 0.216 | -0.557 | -2.37  |
| M67 | -0.729 | 0.382 | -1.027 | -3.015 |
| M69 | -0.419 | 0.059 | -0.591 | -2.711 |
| M71 | -0.393 | 0.049 | -0.744 | -2.151 |
| M72 | -0.365 | 0.035 | -0.752 | -1.946 |
| M73 | -0.422 | 0     | -0.931 | -1.831 |
| M74 | -0.623 | 0.058 | -0.996 | -2.113 |
| M75 | -0.522 | 0.181 | -0.776 | -2.864 |
| M76 | -0.342 | 0.05  | -0.587 | -1.986 |
| M77 | -0.399 | 0.034 | -0.762 | -1.946 |
| M78 | -0.549 | 0.068 | -0.795 | -2.099 |
| M79 | -0.387 | 0.027 | -0.771 | -1.923 |
| M82 | 0.018  | 0.23  | -0.953 | -2.617 |
| M83 | -0.454 | 0.163 | -0.998 | -2.394 |
| M86 | 0.014  | 0.659 | -0.395 | -3.036 |

**Table S10:** Predicted metabolism profile of all pyrazole derviatives

| METABOLISM |                  |                   |                  |                  |                  |
|------------|------------------|-------------------|------------------|------------------|------------------|
| Molecule   | CYP1A2 inhibitor | CYP2C19 inhibitor | CYP2C9 inhibitor | CYP2D6 inhibitor | CYP3A4 inhibitor |
| M3         | Non-Inhibitor    | Non-Inhibitor     | Non-Inhibitor    | Non-Inhibitor    | Non-Inhibitor    |
| M7         | Inhibitor        | Non-Inhibitor     | Non-Inhibitor    | Non-Inhibitor    | Non-Inhibitor    |
| M8         | Inhibitor        | Non-Inhibitor     | Non-Inhibitor    | Non-Inhibitor    | Non-Inhibitor    |
| M9         | Non-Inhibitor    | Non-Inhibitor     | Non-Inhibitor    | Non-Inhibitor    | Non-Inhibitor    |
| M10        | Non-Inhibitor    | Non-Inhibitor     | Non-Inhibitor    | Non-Inhibitor    | Non-Inhibitor    |
| M11        | Inhibitor        | Non-Inhibitor     | Non-Inhibitor    | Non-Inhibitor    | Non-Inhibitor    |
| M12        | Inhibitor        | Non-Inhibitor     | Non-Inhibitor    | Non-Inhibitor    | Non-Inhibitor    |
| M13        | Inhibitor        | Non-Inhibitor     | Non-Inhibitor    | Non-Inhibitor    | Non-Inhibitor    |
| M14        | Non-             | Non-              | Non-             | Non-             | Non-             |



|     |               |               |               |               |               |
|-----|---------------|---------------|---------------|---------------|---------------|
|     | Inhibitor     | Inhibitor     | Inhibitor     | Inhibitor     | Inhibitor     |
| M15 | Non-Inhibitor | Non-Inhibitor | Non-Inhibitor | Non-Inhibitor | Non-Inhibitor |
| M16 | Inhibitor     | Non-Inhibitor | Non-Inhibitor | Non-Inhibitor | Non-Inhibitor |
| M17 | Inhibitor     | Non-Inhibitor | Non-Inhibitor | Non-Inhibitor | Non-Inhibitor |
| M18 | Inhibitor     | Non-Inhibitor | Non-Inhibitor | Non-Inhibitor | Non-Inhibitor |
| M19 | Inhibitor     | Non-Inhibitor | Non-Inhibitor | Non-Inhibitor | Non-Inhibitor |
| M20 | Inhibitor     | Non-Inhibitor | Non-Inhibitor | Non-Inhibitor | Non-Inhibitor |
| M21 | Inhibitor     | Inhibitor     | Non-Inhibitor | Non-Inhibitor | Non-Inhibitor |
| M22 | Inhibitor     | Inhibitor     | Non-Inhibitor | Non-Inhibitor | Non-Inhibitor |
| M23 | Inhibitor     | Inhibitor     | Inhibitor     | Non-Inhibitor | Non-Inhibitor |
| M24 | Inhibitor     | Inhibitor     | Inhibitor     | Non-Inhibitor | Non-Inhibitor |
| M25 | Non-Inhibitor | Non-Inhibitor | Non-Inhibitor | Non-Inhibitor | Non-Inhibitor |
| M26 | Inhibitor     | Inhibitor     | Inhibitor     | Non-Inhibitor | Non-Inhibitor |
| M27 | Inhibitor     | Inhibitor     | Inhibitor     | Non-Inhibitor | Non-Inhibitor |
| M28 | Inhibitor     | Inhibitor     | Non-Inhibitor | Non-Inhibitor | Non-Inhibitor |
| M29 | Inhibitor     | Non-Inhibitor | Non-Inhibitor | Non-Inhibitor | Non-Inhibitor |
| M31 | Inhibitor     | Inhibitor     | Non-Inhibitor | Non-Inhibitor | Non-Inhibitor |
| M32 | Inhibitor     | Inhibitor     | Inhibitor     | Non-Inhibitor | Non-Inhibitor |
| M33 | Inhibitor     | Inhibitor     | Non-Inhibitor | Non-Inhibitor | Non-Inhibitor |
| M34 | Inhibitor     | Inhibitor     | Inhibitor     | Non-Inhibitor | Non-Inhibitor |
| M36 | Inhibitor     | Inhibitor     | Inhibitor     | Non-Inhibitor | Non-Inhibitor |
| M37 | Non-Inhibitor | Non-Inhibitor | Non-Inhibitor | Non-Inhibitor | Non-Inhibitor |
| M38 | Non-Inhibitor | Non-Inhibitor | Non-Inhibitor | Non-Inhibitor | Non-Inhibitor |
| M39 | Non-Inhibitor | Non-Inhibitor | Non-Inhibitor | Non-Inhibitor | Non-Inhibitor |
| M40 | Non-Inhibitor | Non-Inhibitor | Non-Inhibitor | Non-Inhibitor | Non-Inhibitor |
| M41 | Inhibitor     | Inhibitor     | Non-Inhibitor | Non-Inhibitor | Non-Inhibitor |
| M42 | Inhibitor     | Inhibitor     | Inhibitor     | Non-Inhibitor | Non-Inhibitor |
| M43 | Inhibitor     | Non-Inhibitor | Non-Inhibitor | Non-Inhibitor | Non-Inhibitor |

|     |               |               |               |               |               |
|-----|---------------|---------------|---------------|---------------|---------------|
| M44 | Non-Inhibitor | Non-Inhibitor | Non-Inhibitor | Non-Inhibitor | Non-Inhibitor |
| M45 | Non-Inhibitor | Non-Inhibitor | Non-Inhibitor | Non-Inhibitor | Non-Inhibitor |
| M46 | Inhibitor     | Inhibitor     | Non-Inhibitor | Non-Inhibitor | Non-Inhibitor |
| M47 | Inhibitor     | Non-Inhibitor | Non-Inhibitor | Non-Inhibitor | Non-Inhibitor |
| M48 | Non-Inhibitor | Non-Inhibitor | Non-Inhibitor | Non-Inhibitor | Non-Inhibitor |
| M49 | Inhibitor     | Inhibitor     | Inhibitor     | Non-Inhibitor | Non-Inhibitor |
| M50 | Non-Inhibitor | Non-Inhibitor | Non-Inhibitor | Non-Inhibitor | Non-Inhibitor |
| M53 | Non-Inhibitor | Non-Inhibitor | Non-Inhibitor | Non-Inhibitor | Non-Inhibitor |
| M54 | Inhibitor     | Non-Inhibitor | Non-Inhibitor | Non-Inhibitor | Non-Inhibitor |
| M56 | Non-Inhibitor | Non-Inhibitor | Non-Inhibitor | Non-Inhibitor | Non-Inhibitor |
| M59 | Inhibitor     | Inhibitor     | Non-Inhibitor | Non-Inhibitor | Non-Inhibitor |
| M63 | Inhibitor     | Non-Inhibitor | Non-Inhibitor | Non-Inhibitor | Non-Inhibitor |
| M64 | Inhibitor     | Inhibitor     | Non-Inhibitor | Non-Inhibitor | Non-Inhibitor |
| M67 | Inhibitor     | Inhibitor     | Non-Inhibitor | Non-Inhibitor | Non-Inhibitor |
| M69 | Inhibitor     | Inhibitor     | Inhibitor     | Non-Inhibitor | Non-Inhibitor |
| M71 | Inhibitor     | Inhibitor     | Inhibitor     | Non-Inhibitor | Non-Inhibitor |
| M72 | Inhibitor     | Inhibitor     | Inhibitor     | Non-Inhibitor | Non-Inhibitor |
| M73 | Inhibitor     | Inhibitor     | Inhibitor     | Non-Inhibitor | Non-Inhibitor |
| M74 | Inhibitor     | Inhibitor     | Inhibitor     | Non-Inhibitor | Non-Inhibitor |
| M75 | Inhibitor     | Inhibitor     | Inhibitor     | Non-Inhibitor | Non-Inhibitor |
| M76 | Inhibitor     | Inhibitor     | Inhibitor     | Non-Inhibitor | Non-Inhibitor |
| M77 | Inhibitor     | Inhibitor     | Inhibitor     | Non-Inhibitor | Non-Inhibitor |
| M78 | Inhibitor     | Inhibitor     | Inhibitor     | Non-Inhibitor | Non-Inhibitor |
| M79 | Inhibitor     | Inhibitor     | Inhibitor     | Non-Inhibitor | Non-Inhibitor |
| M82 | Inhibitor     | Non-Inhibitor | Non-Inhibitor | Non-Inhibitor | Non-Inhibitor |
| M83 | Inhibitor     | Inhibitor     | Non-Inhibitor | Non-Inhibitor | Non-Inhibitor |
| M86 | Non-Inhibitor | Non-Inhibitor | Non-Inhibitor | Non-Inhibitor | Non-Inhibitor |

**Table S11:** Predicted excretion profile of all pyrazole derviatives.

| <b>Excretion</b> |                        |                             |
|------------------|------------------------|-----------------------------|
| <b>Molecule</b>  | <b>Total Clearance</b> | <b>Renal OCT2 substrate</b> |
| M3               | 0.774                  | No                          |
| M7               | 0.805                  | No                          |
| M8               | 0.803                  | No                          |
| M9               | 0.906                  | No                          |
| M10              | 0.774                  | No                          |
| M11              | 0.174                  | No                          |
| M12              | 0.171                  | No                          |
| M13              | 0.04                   | No                          |
| M14              | 0.824                  | No                          |
| M15              | 0.784                  | No                          |
| M16              | 0.796                  | No                          |
| M17              | 0.055                  | No                          |
| M18              | 0.629                  | No                          |
| M19              | 0.034                  | No                          |
| M20              | 0.824                  | No                          |
| M21              | 0.908                  | No                          |
| M22              | 0.713                  | Yes                         |
| M23              | 0.703                  | No                          |
| M24              | 0.812                  | Yes                         |
| M25              | 0.677                  | Yes                         |
| M26              | 0.239                  | Yes                         |
| M27              | 0.23                   | No                          |
| M28              | 0.098                  | Yes                         |
| M29              | 0.758                  | No                          |
| M31              | 0.721                  | No                          |
| M32              | 0.116                  | Yes                         |
| M33              | 0.543                  | Yes                         |
| M34              | 0.095                  | Yes                         |
| M36              | 0.809                  | No                          |
| M37              | 0.709                  | No                          |
| M38              | 0.846                  | No                          |
| M39              | 0.805                  | No                          |
| M40              | 0.773                  | No                          |
| M41              | 0.102                  | No                          |
| M42              | 0.095                  | No                          |
| M43              | -0.189                 | No                          |
| M44              | 0.816                  | No                          |
| M45              | 0.742                  | No                          |
| M46              | -0.019                 | No                          |
| M47              | 0.534                  | No                          |
| M48              | 0.809                  | No                          |

|     |        |    |
|-----|--------|----|
| M49 | -0.041 | No |
| M50 | 0.721  | No |
| M53 | 0.102  | No |
| M54 | 0.146  | No |
| M56 | 0.033  | No |
| M59 | 0.241  | No |
| M63 | 0.124  | No |
| M64 | 0.211  | No |
| M67 | 0.222  | No |
| M69 | 0.343  | No |
| M71 | 0.307  | No |
| M72 | 0.322  | No |
| M73 | 0.315  | No |
| M74 | 0.031  | No |
| M75 | 0.373  | No |
| M76 | 0.276  | No |
| M77 | 0.202  | No |
| M78 | 0.183  | No |
| M79 | 0.18   | No |
| M82 | 1.077  | No |
| M83 | 0.935  | No |
| M86 | 0.197  | No |

**Table S12:** *In silico* toxicity prediction of all pyrazole derivatives using pkCSM web tool.

| Toxicity  |               |                             |                  |                   |                                |                                   |                |                    |                       |                 |
|-----------|---------------|-----------------------------|------------------|-------------------|--------------------------------|-----------------------------------|----------------|--------------------|-----------------------|-----------------|
| Molecules | AMES toxicity | Max. tolerated dose (human) | hERG I inhibitor | hERG II inhibitor | Oral Rat Acute Toxicity (LD50) | Oral Rat Chronic Toxicity (LOAEL) | Hepatotoxicity | Skin Sensitisation | T.Pyriformis toxicity | Minnow toxicity |
| M3        | Yes           | 1.113                       | No               | No                | 2.279                          | 2.005                             | No             | No                 | -0.468                | 3.394           |
| M7        | Yes           | 0.211                       | No               | No                | 2.73                           | 1.371                             | No             | No                 | 1.596                 | 3.033           |
| M8        | Yes           | 0.26                        | No               | No                | 2.509                          | 1.383                             | No             | No                 | 0.96                  | 1.853           |
| M9        | Yes           | 0.066                       | No               | No                | 2.849                          | 1.358                             | Yes            | No                 | 1.459                 | 2.082           |
| M10       | Yes           | -0.064                      | No               | No                | 2.545                          | 1.466                             | No             | No                 | 1.764                 | 3.377           |
| M11       | Yes           | 0.183                       | No               | No                | 2.978                          | 1.283                             | Yes            | No                 | 1.498                 | 1.87            |
| M12       | No            | 0.144                       | No               | No                | 2.967                          | 1.203                             | No             | No                 | 2.072                 | 1.119           |
| M13       | No            | 0.156                       | No               | No                | 2.468                          | 1.495                             | No             | No                 | 1.196                 | 1.715           |
| M14       | Yes           | 0.527                       | No               | No                | 3.027                          | 0.649                             | Yes            | No                 | 0.499                 | 2.308           |
| M15       | No            | 0.152                       | No               | No                | 2.63                           | 1.178                             | No             | No                 | 0.652                 | 2.114           |
| M16       | Yes           | 0.226                       | No               | No                | 2.553                          | 1.354                             | No             | No                 | 1.543                 | 1.651           |
| M17       | Yes           | 0.123                       | No               | No                | 2.961                          | 1.291                             | Yes            | No                 | 2.039                 | 2.719           |
| M18       | Yes           | 0.164                       | No               | No                | 2.763                          | 1.359                             | No             | No                 | 1.628                 | 3.052           |
| M19       | Yes           | 0.11                        | No               | No                | 2.959                          | 1.281                             | Yes            | No                 | 2.091                 | 2.573           |
| M20       | Yes           | 0.216                       | No               | No                | 2.772                          | 1.346                             | Yes            | No                 | 1.299                 | 2.067           |
| M21       | Yes           | 0.694                       | No               | No                | 2.449                          | 1.373                             | No             | No                 | 1.308                 | 0.796           |

|     |     |        |    |     |       |       |     |    |       |        |
|-----|-----|--------|----|-----|-------|-------|-----|----|-------|--------|
| M22 | Yes | -0.101 | No | No  | 2.192 | 1.389 | No  | No | 2.006 | 1.895  |
| M23 | No  | 0.101  | No | No  | 2.346 | 1.422 | No  | No | 1.408 | 1.248  |
| M24 | Yes | 0.022  | No | No  | 2.508 | 1.385 | Yes | No | 1.974 | 1.167  |
| M25 | Yes | -0.039 | No | No  | 3.172 | 1.364 | No  | No | 1.299 | 1.947  |
| M26 | Yes | -0.118 | No | No  | 2.307 | 1.309 | No  | No | 2.138 | 1.581  |
| M27 | No  | 0.059  | No | No  | 2.727 | 1.32  | No  | No | 2.171 | 0.641  |
| M28 | Yes | -0.041 | No | No  | 2.591 | 1.297 | No  | No | 1.74  | 1.154  |
| M29 | No  | -0.355 | No | No  | 2.426 | 1.213 | Yes | No | 1.336 | 1.649  |
| M31 | Yes | 0.096  | No | No  | 2.472 | 1.381 | No  | No | 2.057 | 1.173  |
| M32 | Yes | 0.097  | No | No  | 2.596 | 1.31  | No  | No | 2.141 | 0.956  |
| M33 | No  | 0.091  | No | No  | 2.472 | 1.379 | No  | No | 1.994 | 1.289  |
| M34 | No  | 0.09   | No | No  | 2.599 | 1.3   | No  | No | 2.157 | 0.81   |
| M36 | No  | 0.225  | No | Yes | 2.276 | 2.261 | No  | No | 0.894 | 0.054  |
| M37 | No  | 0.632  | No | No  | 2.322 | 1.643 | Yes | No | 0.913 | 1.708  |
| M38 | No  | 0.545  | No | No  | 2.402 | 1.474 | Yes | No | 0.824 | 1.429  |
| M39 | No  | 0.505  | No | No  | 2.35  | 1.638 | Yes | No | 0.982 | 1.606  |
| M40 | Yes | 0.741  | No | No  | 2.411 | 1.946 | Yes | No | 1.108 | 1.28   |
| M41 | No  | 0.596  | No | No  | 2.494 | 1.563 | No  | No | 1.105 | 1.394  |
| M42 | No  | 0.559  | No | No  | 2.64  | 1.482 | Yes | No | 1.203 | 1.08   |
| M43 | No  | 0.661  | No | No  | 2.433 | 1.555 | Yes | No | 0.729 | 1.592  |
| M44 | No  | 0.318  | No | No  | 2.601 | 0.782 | Yes | No | 0.426 | 2.642  |
| M45 | Yes | 0.467  | No | No  | 2.43  | 1.401 | Yes | No | 0.919 | 1.227  |
| M46 | No  | 0.596  | No | No  | 2.494 | 1.563 | Yes | No | 1.105 | 1.394  |
| M47 | No  | 0.641  | No | No  | 2.311 | 1.631 | Yes | No | 0.838 | 1.727  |
| M48 | No  | 0.26   | No | No  | 2.309 | 1.276 | Yes | No | 0.504 | 1.33   |
| M49 | No  | 0.587  | No | No  | 2.489 | 1.552 | Yes | No | 1.124 | 1.248  |
| M50 | No  | 0.585  | No | No  | 2.341 | 1.626 | No  | No | 0.998 | 1.591  |
| M53 | No  | 0.187  | No | No  | 2.125 | 1.494 | Yes | No | 0.143 | 2.584  |
| M54 | Yes | 0.228  | No | No  | 2.501 | 1.321 | Yes | No | 0.758 | 1.249  |
| M56 | No  | 0.452  | No | No  | 2.771 | 0.815 | Yes | No | 0.253 | 2.54   |
| M59 | Yes | 0.13   | No | No  | 2.605 | 1.075 | Yes | No | 0.857 | 0.666  |
| M63 | No  | 0.353  | No | No  | 2.561 | 1.857 | Yes | No | 0.593 | 0.219  |
| M64 | Yes | 0.188  | No | No  | 2.527 | 1.076 | Yes | No | 0.882 | 0.672  |
| M67 | Yes | 0.496  | No | No  | 2.842 | 0.919 | Yes | No | 0.663 | 2.148  |
| M69 | No  | 0.629  | No | No  | 2.523 | 2.61  | Yes | No | 0.62  | -0.184 |
| M71 | No  | -0.177 | No | Yes | 2.634 | 1.805 | Yes | No | 1.107 | 0.762  |
| M72 | No  | -0.127 | No | Yes | 2.751 | 1.531 | Yes | No | 1.207 | 0.478  |
| M73 | No  | -0.154 | No | Yes | 2.844 | 1.338 | Yes | No | 1.116 | 0.236  |
| M74 | No  | -0.142 | No | Yes | 2.776 | 1.556 | Yes | No | 0.898 | 0.748  |
| M75 | Yes | 0.298  | No | No  | 2.948 | 1.018 | Yes | No | 0.546 | 1.012  |
| M76 | No  | -0.119 | No | Yes | 2.615 | 1.649 | Yes | No | 1.253 | 0.768  |
| M77 | No  | -0.116 | No | Yes | 2.743 | 1.523 | Yes | No | 1.208 | 0.55   |
| M78 | No  | -0.1   | No | No  | 2.621 | 1.798 | Yes | No | 1.103 | 0.883  |
| M79 | No  | -0.124 | No | Yes | 2.736 | 1.495 | Yes | No | 1.204 | 0.404  |
| M82 | Yes | 0.434  | No | No  | 1.849 | 1.665 | Yes | No | 0.383 | 1.67   |
| M83 | No  | 0.286  | No | Yes | 2.672 | 1.298 | Yes | No | 0.305 | 1.457  |

|     |    |       |    |    |       |       |     |    |       |       |
|-----|----|-------|----|----|-------|-------|-----|----|-------|-------|
| M86 | No | 0.143 | No | No | 2.562 | 0.507 | Yes | No | 0.206 | 2.081 |
|-----|----|-------|----|----|-------|-------|-----|----|-------|-------|

### Synthesis section (characteristics of each molecules)

The target compounds were synthesized following the reported procedure [1-12].

#### (E)-N'-(benzylidene)-5-methyl-1H-pyrazole-3-carbohydrazide (M7) :

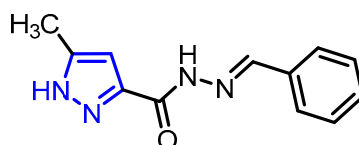

Yield 62% (solid), M.p. 243-245°C; FT-IR (ATR,  $\nu(\text{cm}^{-1})$ ) : 3229 (NH), 1656 (C=O);  $^1\text{H}$ -NMR (300 MHz, DMSO- $d_6$ ,  $\delta(\text{ppm})$ ):  $\delta$  = 2.274 (s, 3H, CH<sub>3</sub>), 6.488 (s, 1H, Pz-H), 7.410 - 7.673 (m, 5H, ArH), 8.478 (s, 1H, CO-NH), 11.588 (s, 1H, N=CH) 13.076 (s, 1H, Pz-NH);  $^{13}\text{C}$ -NMR (75 MHz, DMSO- $d_6$ ,  $\delta(\text{ppm})$ ):  $\delta$  = 10.77, 105.31, 127.41, 129.27, 130.31, 135.03, 140.53, 146.30, 147.61, 158.87; MS:  $m/z$  = 229.3 [M+H]<sup>+</sup>.

#### (E)-N'-(4-methoxybenzylidene)-5-methyl-1H-pyrazole-3-carbohydrazide (M8):

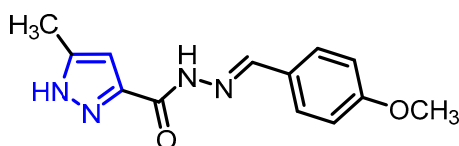

Yield (solid), 78 %, m.p. 260-262 °C; FT-IR (ATR,  $\nu(\text{cm}^{-1})$ ) : 3214 (NH), 1651 (C=O), 1605 (N=CH);  $^1\text{H}$ -NMR (300 MHz, DMSO- $d_6$ ,  $\delta(\text{ppm})$ ): 2.26 (s, 3H, CH<sub>3</sub>), 3.77 (s, 3H, OCH<sub>3</sub>), 6.47 (s, 1H, H-pyrazole), 6.98 (d, J = 8.7 Hz, 2H, H-Ar), 7.60 (d, J = 8.7 Hz, 2H, H-Ar), 8.39 (s, 1H, -NH), 11.44 (s, 1H, N=CH) 13.05 (s, 1H, NH-pyrazole) ;  $^{13}\text{C}$  NMR: (75MHz, DMSO- $d_6$ ,  $\delta$  (ppm)): 10.80, 55.74, 105.22, 114.76, 127.55, 129.02, 140.45, 146.45, 147.53, 158.72, 161.13. MS:  $m/z$  = 259.5 [M+H]<sup>+</sup>, 281.3 [M+Na]<sup>+</sup>.

#### (E)-N'-(4-(dimethylamino)benzylidene)-5-methyl-1H-pyrazole-3-carbohydrazide (M9) :

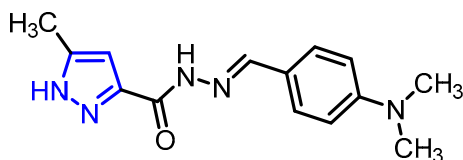

Yield (solid), 81 %, m.p. 259-261 °C; FT-IR (ATR,  $\nu(\text{cm}^{-1})$ ) : 3233 (NH), 1648 (C=O), 1602 (N=CH);  $^1\text{H}$ -NMR (300 MHz, DMSO- $d_6$ ,  $\delta(\text{ppm})$ ):  $\delta$  = 2.26 (s, 3H, CH<sub>3</sub>), 2.94 (s, 6H, N(CH<sub>3</sub>)<sub>2</sub>), 6.45 (s, 1H, H-pyrazole), 6.72 (d, J = 8.7 Hz, 2H, H-Ar), 7.46 (d, J = 8.7 Hz, 2H, H-Ar), 8.30 (s, 1H, -NH), 11.24 (s, 1H, N=CH) 13.01 (s, 1H, NH-pyrazole) ;  $^{13}\text{C}$  NMR:

(75MHz, DMSO- $d_6$ ,  $\delta$  (ppm)): 10.78, 40.28, 105.11, 112.26, 122.33, 128.76, 140.36, 146.60, 148.42, 151.84, 158.45. EST-MS:  $m/z$  = 272.3  $[M+H]^+$ .

**(E)-5-methyl-N'-(4-nitrobenzylidene)-1H-pyrazole-3-carbohydrazide (M10) :**

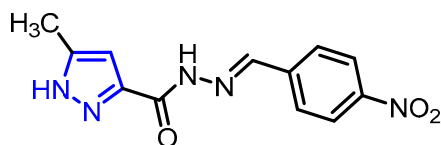

Yield 84% (solid), m.p. 283-285°C; FT-IR (ATR,  $\nu(\text{cm}^{-1})$ ) : 3320 (NH), 1681 (C=O), 1512 (N=CH);  $^1\text{H}$ -NMR (300 MHz, DMSO- $d_6$ ,  $\delta(\text{ppm})$ ):  $\delta$  = 2.28 (s, 3H,  $\text{CH}_3$ ), 6.44 (s, 1H, H-pyrazole), 7.90 (d,  $J$  = 8.7 Hz, 2H, H-Ar), 8.27 (d,  $J$  = 8.7 Hz, 2H, H-Ar), 8.58 (s, 1H, -CONH), 11.92 (s, 1H, N=CH), 13.13 (s, 1H, NH-pyrazole);  $^{13}\text{C}$  NMR: (75MHz, DMSO- $d_6$ ,  $\delta$  (ppm)): 10.77, 105.52, 124.25, 128.33, 140.71, 141.40, 145.11, 146.01, 148.14, 159.10; MS:  $m/z$  = 274.1  $[M+H]^+$ .

**(E)-N'-(2-chlorobenzylidene)-5-methyl-1H-pyrazole-3-carbohydrazide (M11) :**

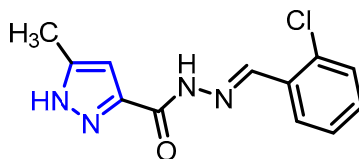

Yield 78% (solid), m.p. 258-260°C; FT-IR (ATR,  $\nu(\text{cm}^{-1})$ ) : 3182 (NH), 1665 (C=O), 1552 (N=CH);  $^1\text{H}$ NMR (300 MHz, DMSO- $d_6$ ,  $\delta(\text{ppm})$ ):  $\delta$  = 2.27 (s, 3H,  $\text{CH}_3$ ), 6.49 (s, 1H, H-pyrazole), 7.39 - 7.99 (m, 4H, H-pyrazole), 8.90 (s, 1H, -N=CH), 11.92 (s, 1H, -CONH), 13.09 (s, 1H, NH-pyrazole) ;  $^{13}\text{C}$  NMR: (75MHz, DMSO- $d_6$ ,  $\delta$  (ppm)): 10.77, 105.40, 127.31, 128.01, 130.34, 131.70, 132.41, 133.57, 140.56, 143.65, 146.16, 159.05; ESI-MS:  $m/z$  = 263.1  $[M+H]^+$ .

**(E)-N'-(2,4-dichlorobenzylidene)-5-methyl-1H-pyrazole-3-carbohydrazide (M12)**

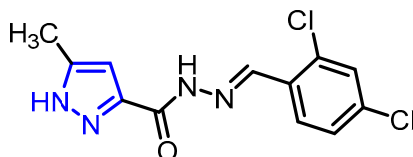

Yield 95% (solid), m.p. 258-260°C; FT-IR (ATR,  $\nu(\text{cm}^{-1})$ ) : 3326 (NH), 11684 (C=O), 1584 (N=CH);  $^1\text{H}$ -NMR (300 MHz, DMSO- $d_6$ ,  $\delta(\text{ppm})$ ):  $\delta$  = 2.277 (s, 3H,  $\text{CH}_3$ ), 6.498 (s, 1H, Pz-H), 7.475 - 7.509 (dd, 1H, ArH), 7.678, 7.685 (d, 1H, ArH), 7.963, 7.991 (d, 1H, ArH), 8.866 (s, 1H, -N=CH), 11.986 (s, 1H, CONH), 13.106 (s, 1H, Pz-NH) ; ESI-MS:  $m/z$  = 297.1  $[M+H]^+$ .

**(E)-N'-(2-bromo-5-hydroxybenzylidene)-5-methyl-1H-pyrazole-3-carbohydrazide (M13)**

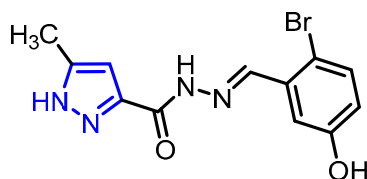

Yield 63% (solid), m.p. 254-256°C; FT-IR (ATR,  $\nu(\text{cm}^{-1})$ ) : 3314 (NH), 1692 (C=O), 1533 (N=CH);  $^1\text{H}$  NMR (300 MHz,  $\text{d}_6\text{-DMSO}$ ,  $\delta(\text{ppm})$ ):  $\delta$  = 2.278 (s, 3H,  $-\text{CH}_3$ ), 6.503 (s, 1H, OH), 6.506 (s, 1H, Pz-H), 6.856, 6.886 (d, 1H, ArH), 7.374 - 7.412 (dd, 1H, ArH), 7.657, 7.665 (d, 1H, ArH), 8.614 (s, 1H,  $-\text{N}=\text{CH}$ ), 11.379 (s, 1H,  $-\text{CONH}$ ), 13.128 (s, 1H, Pz-NH);  $^{13}\text{C}$  NMR (75 MHz,  $\text{DMSO-d}_6$ ,  $\delta(\text{ppm})$ ):  $\delta$  = 10.77, 105.46, 110.77, 119.14, 121.77, 131.21, 133.77, 140.64, 145.78, 146.13, 156.88, 158.87; ESI-MS:  $m/z$  = 323.2  $[\text{M}+\text{H}]^+$ .

**(E)-N'-(furan-2-ylmethylene)-5-methyl-1H-pyrazole-3-carbohydrazide (M14) :**

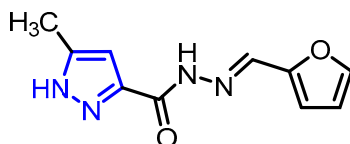

Yield 73% (solid), M.p. 272-274°C; FT-IR (ATR,  $\nu(\text{cm}^{-1})$ ) : 3224 (NH), 1652 (C=O), 1545 (N=CH);  $^1\text{H}$ -NMR (300 MHz,  $\text{DMSO-d}_6$ ,  $\delta(\text{ppm})$ ):  $\delta$  = 2.269 (s, 3H,  $-\text{CH}_3$ ), 6.467 (s, 1H, Pz-H), 6.591 – 6.608 (m, 1H, FurH), 6.826 – 6.837 (d, 1H, FurH), 7.800 – 7.803 (d, 1H, FurH), 8.367 (s, 1H,  $-\text{N}=\text{CH}$ ), 11.592 (s, 1H,  $-\text{CO-NH}$ ), 13.059 (s, 1H, Pz-NH);  $^{13}\text{C}$  NMR (75 MHz,  $\text{DMSO-d}_6$ ,  $\delta(\text{ppm})$ ):  $\delta$  = 10.77, 105.31, 121.62, 113.22, 137.41, 140.54, 145.35, 146.27, 150.20, 158.80 ; ESI-MS:  $m/z$  = 219.3  $[\text{M}+\text{H}]^+$ .

**(E)-N'-(4-hydroxy-3-methoxybenzylidene)-5-methyl-1H-pyrazole-3-carbohydrazide (M15) :**

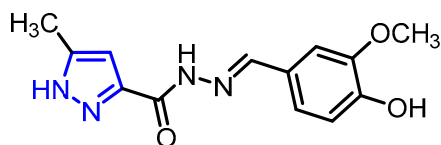

Yield 65 % (solid), m.p. 226-228 °C; FT-IR (ATR,  $\nu(\text{cm}^{-1})$ ) : 3483 (OH), 3258 (NH), 1648 (C=O), 1590 (N=CH);  $^1\text{H}$ -NMR (300 MHz,  $\text{DMSO-d}_6$ ,  $\delta(\text{ppm})$ ):  $\delta$  = 2.26 (s, 3H,  $\text{CH}_3$ ), 3.80 (s, 3H,  $\text{OCH}_3$ ), 6.46 (s, 1H, H-pyrazole), 6.80 (d,  $J$  = 8.1 Hz, 1H, H-Ar), 7.00 (d,  $J$  = 8.1 Hz, 1H, H-Ar), 7.26 sd, 1H, H-Ar), 8.33 (s, 1H, CONH), 9.51 (s, 1H, OH), 11.38 (s, 1H, N=CH) 13.03 (s, 1H, NH-pyrazole) ;  $^{13}\text{C}$  NMR: (75MHz,  $\text{DMSO-d}_6$ ,  $\delta$  (ppm)): 10.77 ( $\text{CH}_3$ ), 56.00 ( $\text{OCH}_3$ ), 105.20 (CH, C4-pyrazole), 109.20 (CH, C6-Ar), 115.86 (CH, C3-Ar), 122.43 (CH,



C2-Ar), 126.42 (C, C1-Ar), 148.20 (C, C3-pyrazole), 148.47 (CH, N=CH), 149.23 (C, C5-pyrazole), 149.85 (C, OCH<sub>3</sub>), 158.91 (C, OH), 158.91 (C, C=O); ESI-MS: m/z = 275.2 [M+H]<sup>+</sup>.

**(E)-5-methyl-N'-(4-methylbenzylidene)-1H-pyrazole-3-carbohydrazide (M16) :**

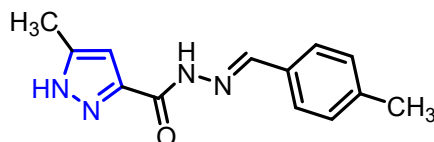

Yield 59 % (solid), m.p. 292-294 °C; FT-IR (ATR,  $\nu(\text{cm}^{-1})$ ) : 3224 (NH), 1654 (C=O), 1606 (N=CH); <sup>1</sup>H-NMR (300 MHz, DMSO-d<sub>6</sub>,  $\delta(\text{ppm})$ ):  $\delta$  = 2.26 (s, 3H, CH<sub>3</sub>), 2.31 (s, 3H, CH<sub>3</sub>), 6.50 (s, 1H, H-pyrazole), 7.23 (d, J = 8.1 Hz, 2H, H-Ar), 7.55 (d, J = 8.1 Hz, 2H, H-Ar), 8.42 (s, 1H, -NH), 11.98 (s, 1H, N=CH) 13.10 (s, 1H, NH-pyrazole) ; <sup>13</sup>C NMR: (75MHz, DMSO-d<sub>6</sub>,  $\delta$  (ppm)): 11.06 (CH<sub>3</sub>), 21.48 (CH<sub>3</sub>), 105.27 (CH, C4-pyrazole), 127.42 (CH, C2-Ar), 129.88 (CH, C3-Ar), 132.28 (C, C1-Ar), 140.13 (C, C1-Ar), 141.73 (C, C3-pyrazole), 146.95 (CH, N=CH), 147.13 (C, C5-pyrazole), 158.80 (C, C=O); ESI-MS: m/z = 243.1 [M+H]<sup>+</sup>.

**(E)-N'-(4-chlorobenzylidene)-5-methyl-1H-pyrazole-3-carbohydrazide (M17) :**

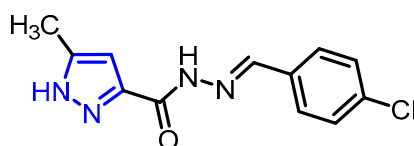

Yield 64 % (solid), m.p. 301-303 °C; FT-IR (ATR,  $\nu(\text{cm}^{-1})$ ) : 3237 (NH), 1654 (C=O), 1608 (N=CH); <sup>1</sup>H-NMR (300 MHz, DMSO-d<sub>6</sub>,  $\delta(\text{ppm})$ ):  $\delta$  = 2.27 (s, 3H, CH<sub>3</sub>), 6.49 (s, 1H, H-pyrazole), 7.47 (d, J = 8.7 Hz, 2H, H-Ar), 7.68 (d, J = 8.7 Hz, 2H, H-Ar), 8.45 (s, 1H, CONH), 11.67 (s, 1H, N=CH) 13.09 (s, 1H, NH-pyrazole) ; <sup>13</sup>C NMR: (75MHz, DMSO-d<sub>6</sub>,  $\delta$  (ppm)): 10.77 (CH<sub>3</sub>), 105.35 (CH, C4-pyrazole), 129.04 (CH, C3-Ar), 129.37 (CH, C2-Ar), 133.98 (C, C1-Ar), 134.70 (C, C4-Ar), 140.57 (C, C3-pyrazole), 146.27 (CH, N=CH), 147.23 (C, C5-pyrazole), 158.91 (C, C=O); ESI-MS: m/z = 263.2 [M+H]<sup>+</sup>.

**(E)-N'-(4-fluorobenzylidene)-5-methyl-1H-pyrazole-3-carbohydrazide (M18) :**

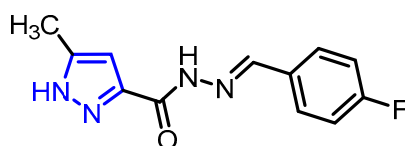

Yield 75 % (solid), m.p. 310-312 °C; FT-IR (ATR,  $\nu(\text{cm}^{-1})$ ) : 3189 (NH), 1666 (C=O), 1604 (N=CH); <sup>1</sup>H-NMR (300 MHz, DMSO-d<sub>6</sub>,  $\delta(\text{ppm})$ ):  $\delta$  = 2.27 (s, 3H, CH<sub>3</sub>), 6.48 (s, 1H, H-

pyrazole), 7.47 (d,  $J = 8.7$  Hz, 2H, H-Ar), 7.68 (d,  $J = 8.7$  Hz, 2H, H-Ar), 8.46 (s, 1H, CONH), 11.59 (s, 1H, N=CH) 13.07 (s, 1H, NH-pyrazole) ;  $^{13}\text{C}$  NMR: (75MHz, DMSO- $\text{d}_6$ ,  $\delta$  (ppm)): 10.77 ( $\text{CH}_3$ ), 105.31 (CH, C4-pyrazole), 116.19 (CH, C3-Ar), 129.50 (CH, C2-Ar), 131.63 (C, C1-Ar), 140.55 (C, C3-pyrazole), 146.28 (CH, N=CH), 158.89 (C, C5-pyrazole), 161.80 (C, C=O), 165.08 (C, C4-Ar); ESI-MS:  $m/z = 247.1$   $[\text{M}+\text{H}]^+$ .

**(E)-N'-(4-bromobenzylidene)-5-methyl-1H-pyrazole-3-carbohydrazide (M19) :**

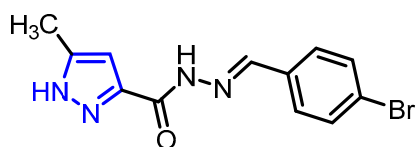

Yield 80 % (solid), m.p. 300-302 °C; FT-IR (ATR,  $\nu(\text{cm}^{-1})$ ) : 3226 (NH), 1655 (C=O), 1592 (N=CH);  $^1\text{H}$ -NMR (300 MHz, DMSO- $\text{d}_6$ ,  $\delta(\text{ppm})$ ):  $\delta = 2.26$  (s, 3H,  $\text{CH}_3$ ), 6.49 (s, 1H, H-pyrazole), 7.42 (d,  $J = 8.7$  Hz, 2H, H-Ar), 7.61 (d,  $J = 8.7$  Hz, 2H, H-Ar), 8.45 (s, 1H, CONH), 11.67 (s, 1H, N=CH) 13.09 (s, 1H, NH-pyrazole) ;  $^{13}\text{C}$  NMR: (75MHz, DMSO- $\text{d}_6$ ,  $\delta$  (ppm)): 10.76 ( $\text{CH}_3$ ), 105.36 (CH, C4-pyrazole), 123.48 (CH, C3-Ar), 129.28 (CH, C2-Ar), 132.28 (C, C1-Ar), 134.32 (C, C4-Ar), 140.57 (C, C3-pyrazole), 146.27 (CH, N=CH), 146.36 (C, C5-pyrazole), 158.91 (C, C=O); ESI-MS:  $m/z = 308.1$   $[\text{M}+\text{H}]^+$ .

**(E)-5-methyl-N'-(1-phenylethylidene)-1H-pyrazole-3-carbohydrazide (M20) :**

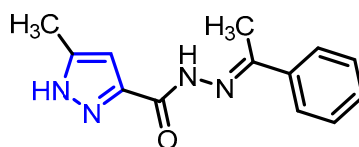

Yield 80 % (solid), m.p. 305-307 °C; FT-IR (ATR,  $\nu(\text{cm}^{-1})$ ) : 3242 (NH), 1655 (C=O), 1591 (N=CH);  $^1\text{H}$ -NMR (300 MHz, DMSO- $\text{d}_6$ ,  $\delta(\text{ppm})$ ):  $\delta = 2.27$  (s, 3H,  $\text{CH}_3$ ), 2.31 (s, 3H,  $\text{CH}_3$ ), 6.51 (s, 1H, H-pyrazole), 7.40-7.82 (m, 5H, H-Ar), 10.21 (s, 1H, CONH), 13.09 (s, 1H, NH-pyrazole) ;  $^{13}\text{C}$  NMR: (75MHz, DMSO- $\text{d}_6$ ,  $\delta$  (ppm)): 10.80, 13.90, 105.17, 126.81, 128.84, 129.82, 138.47, 140.82, 146.32, 153.13, 158.56; ESI-MS:  $m/z = 243.1$   $[\text{M}+\text{H}]^+$ .

**N'-(diphenylmethylene)-5-methyl-1H-pyrazole-3-carbohydrazide (M21) :**

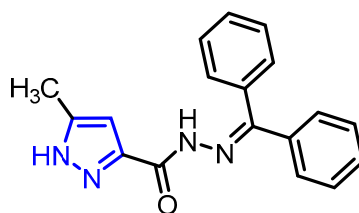

Yield 87 % (solid), m.p. 321-323 °C; IR (ATR,  $\nu(\text{cm}^{-1})$ ) : 3241 (NH), 1655 (C=O), 1592 (N=CH);  $^1\text{H-NMR}$  (300 MHz,  $\text{DMSO-d}_6$ ,  $\delta(\text{ppm})$ ):  $\delta$  = 2.19 (s, 3H,  $\text{CH}_3$ ), 6.46 (s, 1H, H-pyrazole), 7.36-7.65 (m, 10H, H-Ar), 9.80 (s, 1H, CONH), 12.99 (s, 1H, NH-pyrazole) ;  $^{13}\text{C-NMR}$ : (75MHz,  $\text{DMSO-d}_6$ ,  $\delta$  (ppm)): 10.77, 13.90, 105.10, 127.66, 128.66, 130.31, 138.47, 137.28, 141.08, 145.70, 153.35, 158.62; ESI-MS:  $m/z$  = 304.9  $[\text{M}+\text{H}]^+$ .

**(E)-N'-(benzylidene)-5-phenyl-1H-pyrazole-3-carbohydrazide (M22) :**

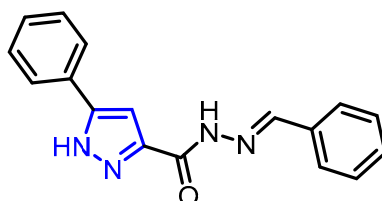

Yield 70% (solid), m.p. 202-204°C; FT-IR [(ATR,  $\nu(\text{cm}^{-1})$ )] : 3250 (NH), 1644 (C=O), 1557 (N=CH);  $^1\text{H-NMR}$  [(300 MHz,  $\text{DMSO-d}_6$ ,  $\delta(\text{ppm})$ ):  $\delta$  = 7.215 (s, 1H, Pz-H), 7.371 – 7.834 (m, 10H, Ar-H), 8.523 (s, 1H, N=CH), 11.725 (s, 1H, -CONH), 13.812 (s, 1H, Pz-NH) ;  $^{13}\text{C-NMR}$  [(75 MHz,  $\text{DMSO-d}_6$ ,  $\delta(\text{ppm})$ ): 105.35 (CH, C4-pyrazole), 125.88 (CH, C2-Ar), 127.52 (CH, C3-Ar), 128.65 (CH, C4-Ar), 129.08 (CH, C3-Ar), 129.31 (CH, C2-Ar), 129.53 (CH, C4-Ar), 130.43 (C, C1-Ar), 134.95 (C, C4-Ar), 144.20 (CH=N), 147.19 (C, C3-pyrazole), 148.06 (C, C5-pyrazole), 158.65 (C=O) ; ESI-MS:  $m/z$  = 291.1  $[\text{M}+\text{H}]^+$ .

**(E)-N'-(4-methoxybenzylidene)-5-phenyl-1H-pyrazole-3-carbohydrazide (M23)**

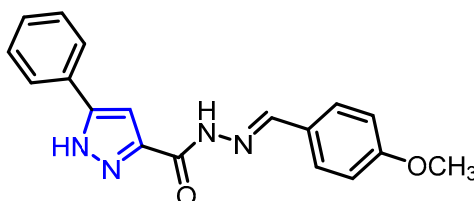

Yield 82% (solid); m.p. 276–278 °C; FT-IR (ATR,  $\nu(\text{cm}^{-1})$ ): 3214 (NH), 1656 (C=O), 1603 (N = CH);  $^1\text{H-NMR}$  (300 MHz,  $\text{DMSO-d}_6$ :  $\delta$  = 3.78 (s, 3H,  $\text{OCH}_3$ ), 7.00 (s, 1H, CH-pz), 7.21 (d,  $J$  = 8.7Hz, 2H, H-Ar), 7.36–7.48 (m, 5H, H-Ar), 7.64 (d,  $J$  = 8.7Hz, 2H, H-Ar), 8.44 (s, 1H, NHCO), 11.59 (s, 1H, N = CH), 13.80 (s, 1H, NH-pz);  $^{13}\text{C-NMR}$  (75 MHz,  $\text{DMSO-d}_6$ :  $\delta$  = 55.75, 103.87, 114.79, 125.81, 127.44, 128.50, 129.16, 129.50, 130.11, 144.15, 147.27, 148.02, 158.49, 161.26; ESI-MS:  $m/z$  = 321.0  $[\text{M}+\text{H}]^+$ .

**(E)-N'-(4-(dimethylamino)benzylidene)-5-phenyl-1H-pyrazole-3-carbohydrazide (M24) :**

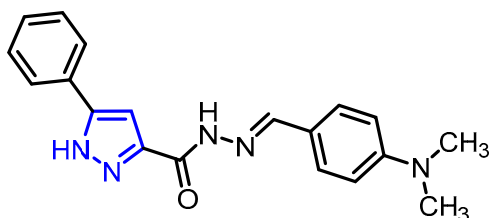

Yield 78% (solid); m.p. 262–264 °C; FT-IR (ATR,  $\nu(\text{cm}^{-1})$ ) : 3219 (NH), 1648 (C = O);  $^1\text{H}$ -NMR (300 MHz, DMSO- $d_6$ ,  $\delta(\text{ppm})$ ):  $\delta$  = 2.95 (s, 6H, 2  $\times$  CH<sub>3</sub>), 6.72 (s, 1H, CHpz), 7.16–6.72 (m, 9H, H-Ar), 8.35 (s, 1H, NHCO), 11.35 (s, 1H, N = CH), 13.72 (s, 1H, NH-pz) ;  $^{13}\text{C}$ -NMR (75 MHz, DMSO- $d_6$ ,  $\delta(\text{ppm})$ ):  $\delta$  = 40.95, 103.73, 112.26, 122.15, 125.80, 128.91, 129.31, 129.73, 133.95, 144.20, 147.19, 148.06, 151.96, 158.12.; ESI-MS :  $m/z$  = 334.5 [M+H]<sup>+</sup>.

**(E)-5-phenyl-N'-(4-nitrobenzylidene)-1H-pyrazole-3-carbohydrazide (M25):**

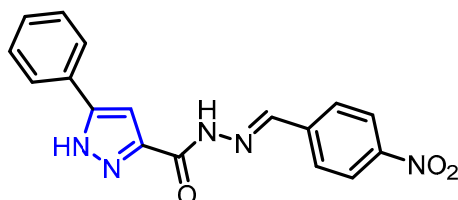

Yield 72% (solid), m.p. 288-290°C; FT-IR [(ATR,  $\nu(\text{cm}^{-1})$ )] : 3225 (NH), 1669 (C=O), 1510 (N=CH);  $^1\text{H}$ -NMR [(300 MHz,  $d_6$ -DMSO,  $\delta(\text{ppm})$ ):  $\delta$  = 7.237 (s, 1H, Pz-H), 7.386 – 8.306 (m, 9H, ArH), 8.636 (s, 1H, N=CH), 12.047 (s, 1H, -CON-H), 13.839 (s, 1H, Pz-NH) ;  $^{13}\text{C}$ -NMR [(75 MHz, DMSO- $d_6$ ,  $\delta(\text{ppm})$ ): 103.92 (C4-pyrazole), 124.54 (3 $\times$ CH), 125.81 (3 $\times$ CH), 128.42 (3 $\times$ CH), 128.96 (C), 129.50 (2 $\times$ C), 141.21 (CH=N), 145.64 (C3-pyrazole), 148.24 (C5-pyrazole), 158.21 (C=O); ESI-MS:  $m/z$  = 336.2 [M+H]<sup>+</sup>.

**(E)-N'-(2-chlorobenzylidene)-5-phenyl-1H-pyrazole-3-carbohydrazide (M26) :**

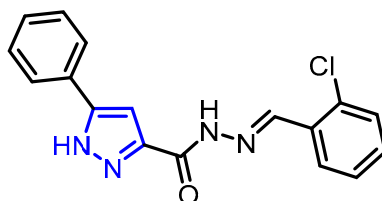

Yield 89% (solid), m.p. 230-232°C; FT-IR [(ATR,  $\nu(\text{cm}^{-1})$ )] : 3145 (NH), 1643 (C=O), 1556 (N=CH);  $^1\text{H}$ NMR (300 MHz, DMSO- $d_6$ ,  $\delta(\text{ppm})$ ):  $\delta$  = 7.233 (s, 1H, Pz-H), 7.368 – 8.034 (m, 9H, ArH), 8.950 (s, 1H, N=CH), 12.074 (s, 1H, -CON-H), 13.834 (s, 1H, Pz-NH);  $^{13}\text{C}$ -NMR [(75 MHz, DMSO- $d_6$ ,  $\delta(\text{ppm})$ ): 103.822 (CH, C4-pyrazole), 125.82 (CH, C2-Ar), 127.53 (CH, C3-Ar), 127.90 (CH, C4-Ar), 128.99 (CH, C3-Ar), 129.49 (CH, C2-Ar), 129.91 (CH,

C4-Ar), 132.18 (C, C1-Ar), 140.28 (C, C4-Ar), 148.20 (CH=N), 156.88 (C, C3-pyrazole), 158.62 (C, C5-pyrazole), 164.13 (C=O) ; ESI-MS:  $m/z = 325.3 [M+H]^+$ .

**(E)-N'-(2,4-dichlorobenzylidene)-5-phenyl-1H-pyrazole-3-carbohydrazide (M27) :**

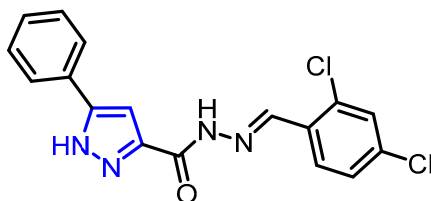

Yield 62 % (solid), m.p. 234-236 °C; FT-IR (ATR,  $\nu(\text{cm}^{-1})$ ) : 3182 (NH), 1657 (C=O), 1586 (N=CH);  $^1\text{H-NMR}$  (300 MHz,  $\text{DMSO-}d_6$ ,  $\delta(\text{ppm})$ ) : 7.24 (s, 1H, H-pyrazole), 7.52-7.34 (m, 4H, H-Ar), 7.69 (d,  $J = 1.8$  Hz, 2H, H-Ar), 7.82 (d,  $J = 7.5$  Hz, 2H, H-Ar), 8.01 (d,  $J = 8.4$  Hz, 2H, H-Ar), 8.89 (s, 1H, -CONH), 12.12 (s, 1H, N=CH) 13.83 (s, 1H, NH-pyrazole); MS:  $m/z = 359.0 [M+H]^+$ , 381.0  $[M+Na]^+$ .

**(E)-N'-(2-bromo-5-hydroxybenzylidene)-5-phenyl-1H-pyrazole-3-carbohydrazide (M28) :**

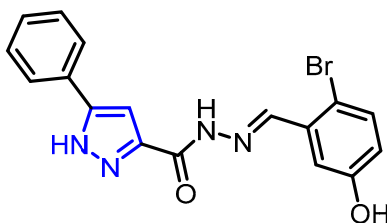

Yield 91% (solid), m.p. 287-289°C; FT-IR (ATR,  $\nu(\text{cm}^{-1})$ ) : 3205 (NH), 1664 (C=O), 1615 (N=CH);  $^1\text{H NMR}$  (300 MHz,  $\text{DMSO-}d_6$ ,  $\delta(\text{ppm})$ ):  $\delta = 6.872$  (s, 1H, OH), 7.223 (s, 1H, PzH), 7.381 – 7.840 (m, 8H, ArH), 8.674 (s, 1H, N=CH), 12.144 (s, 1H, -CON-H), 13.838 (s, 1H, Pz-NH) ; ESI-MS:  $m/z = 386.2 [M+H]^+$ .

**(E)-N'-(furan-2-ylmethylene)-5-phenyl-1H-pyrazole-3-carbohydrazide (M29) :**

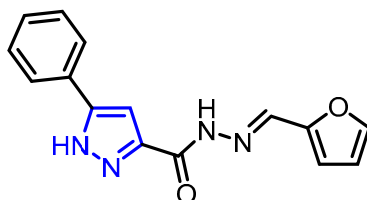

Yield 85% (solid), m.p. 207-209°C; FT-IR (ATR,  $\nu(\text{cm}^{-1})$ ) : 3276 (NH), 1681 (C=O), 1611 (N=CH);  $^1\text{H-NMR}$  (300 MHz,  $\text{DMSO-}d_6$ ,  $\delta(\text{ppm})$ ):  $\delta = 6.609 - 6.654$  (m, 1H, Fur-H), 6.871 (s, 1H, Pz-H) 7.186 – 7.825 (m, 7H, Ar-H, Fur-H), 8.417 (s, 1H, N=CH), 11.717 (s, 1H, CON-H), 13.767 (s, 1H, Pz-NH) ; ESI-MS:  $m/z = 281.3 [M+H]^+$ .

**(E)-N'-(4-hydroxy-3-methoxybenzylidene)-5-phenyl-1H-pyrazole-3-carbohydrazide (M30) :**

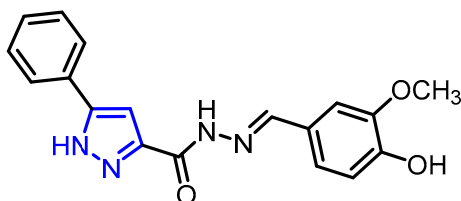

Yield: 85% (solid); m.p: 229–231 °C; FT-IR (ATR,  $\nu(\text{cm}^{-1})$ ): 3276 (NH), 1681 (C=O), 1568 (C=N);  $^1\text{H}$  NMR: (300 MHz, DMSO- $d_6$ ,  $\delta(\text{ppm})$ ): 3.81 (3H, s, -OCH<sub>3</sub>), 6.83 (d,  $J$  = 8.1 Hz, 1H, H-Ar), 7.18 (1H, s, CH-pyrazole), 7.26–7.49 (5H, m, Ar-H), 7.54 (s, 1H, H-Ar), 7.82 (d,  $J$  = 8.1 Hz, 1H, H-Ar), 8.39 (1H, s, N=CH), 11.51 (s, 1H, OH), 11.72 (s, 1H, NHCO), 13.72 (1H, s, NH-pyrazole);  $^{13}\text{C}$  NMR: (75MHz, DMSO- $d_6$ ,  $\delta$  (ppm)): 56.04 (OCH<sub>3</sub>), 103.85 (CH, C4-pyrazole), 115.91 (CH, C-Ar), 122.53 (CH, C-Ar), 125.53 (CH, C-Ar), 126.37 (CH, C-Ar), 128.28 (CH, C-Ar), 129.07 (CHC-Ar), 129.33 (C, C-Ar), 129.54 (C-Ar), 144.12 (CH, N=CH), 145.85 (C, C3-pyrazole), 147.36 (C, C5-pyrazole), 148.63 (C, C-OH), 156.48 (C, C-OCH<sub>3</sub>), 158.40 (C, C=O). ESI-MS:  $m/z$  = 337.0 [M+H]<sup>+</sup>, 359.0 [M+Na]<sup>+</sup>.

**(E)-5-phenyl-N'-(4-methylbenzylidene)-1H-pyrazole-3-carbohydrazide (M31) :**

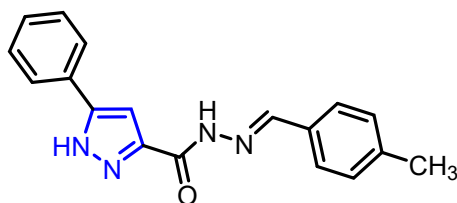

Yield 90% (solid); m.p: 297–299 °C; FT-IR (ATR,  $\nu(\text{cm}^{-1})$ ): 3205 (NH), 1680 (C=O), 1561 (C=N);  $^1\text{H}$  NMR: (300 MHz, DMSO- $d_6$ ,  $\delta(\text{ppm})$ ): 2.32 (3H, s, CH<sub>3</sub>), 7.25 (1H, s, CH-pyrazole), 7.33–7.61 (5H, m, Ar-H), 7.59 (d,  $J$  = 7.8 Hz, 2H, H-Ar), 7.81 (d,  $J$  = 7.8 Hz, 1H, H-Ar), 8.45 (1H, s, N=CH), 11.65 (s, 1H, NHCO), 13.78 (1H, s, NH-pyrazole);  $^{13}\text{C}$  NMR: (75MHz, DMSO- $d_6$ ,  $\delta$  (ppm)): 21.50 (OCH<sub>3</sub>), 103.85 (CH, C4-pyrazole), 125.80 (CH, C-Ar), 127.53 (CH, C-Ar), 127.90 (CH, C-Ar), 128.94 (CH, C-Ar), 129.49 (CH, C-Ar), 129.92 (C, C-Ar), 132.18 (C, C-Ar), 136.80 (C, C-CH<sub>3</sub>), 140.28 (C, C3-pyrazole), 146.18 (CH, N=CH), 148.28 (C, C5-pyrazole), 158.50 (C, C=O). ESI-MS:  $m/z$  = 304.9 [M+H]<sup>+</sup>, 326.9 [M+Na]<sup>+</sup>.

**(E)-N'-(4-chlorobenzylidene)-5-phenyl-1H-pyrazole-3-carbohydrazide (M32) :**

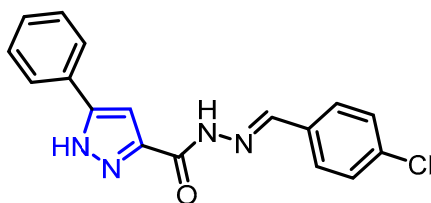

Yield 89% (solid); m.p: 301–303 °C; FT-IR (ATR,  $\nu(\text{cm}^{-1})$ ): 3207 (NH), 1680 (C=O), 1605 (C=N);  $^1\text{H}$  NMR: (300 MHz, DMSO- $\text{d}_6$ ,  $\delta(\text{ppm})$ ): 7.11 (1H, s, CH-pyrazole), 7.33–7.60 (5H, m, Ar-H), 7.59 (d,  $J = 7.2$  Hz, 2H, H-Ar), 7.81 (d,  $J = 7.2$  Hz, 1H, H-Ar), 8.46 (1H, s, N=CH), 11.65 (s, 1H, NHCO), 13.79 (1H, s, NH-pyrazole);  $^{13}\text{C}$  NMR: (75MHz, DMSO- $\text{d}_6$ ,  $\delta$  (ppm)): 103.82 (CH, C4-pyrazole), 125.82 (CH, C-Ar), 127.53 (CH, C-Ar), 127.90 (CH, C-Ar), 128.99 (CH, C-Ar), 129.49 (CH, C-Ar), 129.91 (C, C-Ar), 132.18 (C, C-Ar), 140.28 (C, C-CH<sub>3</sub>), 148.20 (C, C3-pyrazole), 156.88 (CH, N=CH), 158.62 (C, C5-pyrazole), 164.13 (C, C=O). ESI-MS:  $m/z = 325.1$   $[\text{M}+\text{H}]^+$ , 347.3  $[\text{M}+\text{Na}]^+$ .

**(E)-N'-(4-fluorobenzylidene)-5-phenyl-1H-pyrazole-3-carbohydrazide (M33) :**

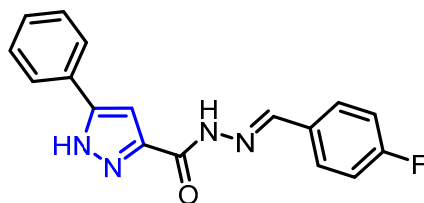

Yield 98% (solid); m.p: 294–296 °C; FT-IR (ATR,  $\nu(\text{cm}^{-1})$ ) : 3320 (NH), 1672 (C=O), 1604 (C=N);  $^1\text{H}$  NMR: (300MHz, DMSO- $\text{d}_6$ ,  $\delta(\text{ppm})$ ): 7.21 (1H, s, CH-pyrazole), 7.25–7.38 (5H, m, Ar-H), 7.42 (d,  $J = 7.8$  Hz, 2H, H-Ar), 7.81 (d,  $J = 7.8$  Hz, 1H, H-Ar), 8.50 (1H, s, N=CH), 11.72 (s, 1H, NHCO), 13.79 (1H, s, NH-pyrazole);  $^{13}\text{C}$  NMR: (75 MHz, DMSO- $\text{d}_6$ ,  $\delta$  (ppm)): 103.86 (CH, C4-pyrazole), 125.82 (CH, CH-Ar), 128.98 (CH, C-Ar), 129.49 (CH, CH-Ar), 129.64 (C, C-Ar), 129.74 (CH, CH-Ar), 130.10 (C, CH-Ar), 130.22 (C, C-Ar), 146.97 (C, C3-pyrazole), 150.50 (CH, N=CH), 156.68 (C, C5-pyrazole), 161.90 (C, C=O), 165.18 (C, C-F). ESI-MS:  $m/z = 309.3$   $[\text{M}+\text{H}]^+$ .

**(E)-N'-(4-bromobenzylidene)-5-phenyl-1H-pyrazole-3-carbohydrazide (M34) :**

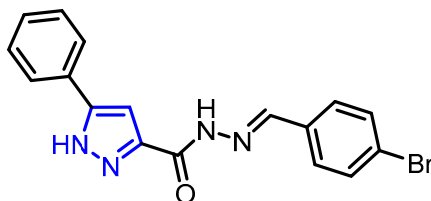

Yield 85% (solid); m.p: 291–293 °C; FT-IR (ATR,  $\nu(\text{cm}^{-1})$ ) : 3319 (NH), 1670 (C=O), 1589 (C=N);  $^1\text{H}$  NMR: (300MHz, DMSO- $\text{d}_6$ ,  $\delta(\text{ppm})$ ): 7.22 (1H, s, CH-pyrazole), 7.37 (d,  $J = 7.2$

Hz, 2H, H-Ar), 7.43–7.64 (5H, m, Ar-H), 7.82 (d,  $J = 7.2$  Hz, 1H, H-Ar), 8.48 (1H, s, N=CH), 11.80 (s, 1H, NHCO), 13.81 (1H, s, NH-pyrazole);  $^{13}\text{C}$  NMR: (75 MHz, DMSO- $d_6$ ,  $\delta$  (ppm)): 103.96, 123.63, 125.84, 129.03, 129.39, 129.75, 132.32, 133.60, 134.19, 144.71, 146.86, 148.63, 158.58. ESI-MS:  $m/z = 368.1$   $[\text{M}+\text{H}]^+$ .

**(E)-5-phenyl-N'-(1-phenylethylidene)-1H-pyrazole-3-carbohydrazide (M35) :**

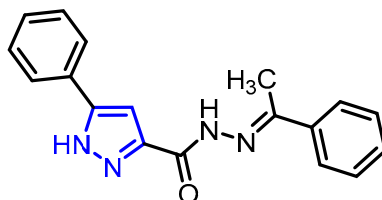

Yield 85% (solid); m.p: 251–253 °C; FT-IR (ATR,  $\nu(\text{cm}^{-1})$ ) : 3320 (NH), 1667 (C=O), 1589 (C=N);  $^1\text{H}$  NMR: (300 MHz, DMSO- $d_6$ ,  $\delta(\text{ppm})$ ): 2.36 (3H, s,  $\text{CH}_3$ ), 7.24 (1H, s, CH-pyrazole), 7.42–7.84 (10H, m, Ar-H), 10.37 (s, 1H, NHCO), 13.82 (1H, s, NH-pyrazole);  $^{13}\text{C}$  NMR: (75 MHz, DMSO- $d_6$ ,  $\delta$  (ppm)): 21.51 ( $\text{OCH}_3$ ), 103.60 (CH, C4-pyrazole), 125.73 (CH, C-Ar), 127.72 (CH, C-Ar), 128.70 (CH, C-Ar), 129.01 (CH, C-Ar), 129.18 (CH, C-Ar), 129.56 (CH, C-Ar), 130.34 (C, C-Ar), 132.07 (C, C-Ar), 137.21 (C, C3-pyrazole), 144.82 (CH, N=CH), 146.45 (C, C5-pyrazole), 157.23 (C, C=O). ESI-MS:  $m/z = 305.4$   $[\text{M}+\text{H}]^+$ .

**N'-(diphenylmethylene)-5-phenyl-1H-pyrazole-3-carbohydrazide (M36) :**

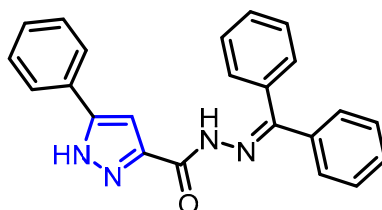

Yield 82% (solid); m.p: 200–202 °C; FT-IR (ATR,  $\nu(\text{cm}^{-1})$ ): 3360 (NH), 1664 (C=O), 1537 (C=N);  $^1\text{H}$  NMR: (300 MHz, DMSO- $d_6$ ,  $\delta(\text{ppm})$ ): 7.20 (1H, s, CH-pyrazole), 7.32–7.76 (15H, m, Ar-H), 9.89 (s, 1H, NHCO), 13.84 (1H, s, NH-pyrazole);  $^{13}\text{C}$  NMR: (75 MHz, DMSO- $d_6$ ,  $\delta$  (ppm)): 105.10 (CH, C4-pyrazole), 127.66 (CH, C-Ar), 128.66 (CH, C-Ar), 128.96 (CH, C-Ar), 130.21 (CH, C-Ar), 130.31 (CH, C-Ar), 130.46 (CH, C-Ar), 132.02 (C, C-Ar), 137.28 (C, C-Ar), 141.08 (C, C3-pyrazole), 145.70 (CH, N=CH), 153.35 (C, C5-pyrazole), 157.62 (C, C=O). ESI-MS:  $m/z = 366.9$   $[\text{M}+\text{H}]^+$ , 389.0  $[\text{M}+\text{H}]^+$ .

**(E)-N'-benzylidene-2-(3,5-dimethyl-1H-pyrazol-1-yl)acetohydrazide (M37) :**



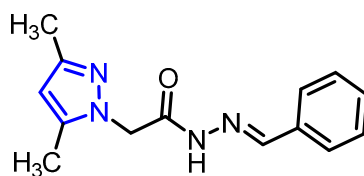

Yield 75% (solid) ; m.p : 170-172 °C ; FT-IR (ATR,  $\nu(\text{cm}^{-1})$ ) : 3369 (NH), 1678 (C=O), 1619 (C=N);  $^1\text{H}$  NMR: (300MHz, DMSO- $d_6$ ,  $\delta(\text{ppm})$ ) : 2.05 (s, 3H, CH<sub>3</sub>), 2.13 (s, 3H, CH<sub>3</sub>), 5.19 (s, 2H, N-CH<sub>2</sub>-), 5.80 (1H, s, CH-pyrazole), 7.41-7.70 (m, 5H, H-Ar), 7.26-7.49 (5H, m, Ar-H), 8.00 (1H, s, N=CH), 11.59 (s, 1H, NHCO);  $^{13}\text{C}$  NMR: (75MHz, DMSO- $d_6$ ,  $\delta$  (ppm)): 11.13 (CH<sub>3</sub>), 13.73 (CH<sub>3</sub>), 50.82 (-CH<sub>2</sub>), 105.21 (CH, C4-pyrazole), 127.60 (CH, C-Ar), 129.28 (CH, C-Ar), 130.45 (CH, C-Ar), 134.43 (C-Ar), 140.56 (C, C3-pyrazole), 144.55 (CH, N=CH), 147.94 (C, C5-pyrazole), 169.04 (C, C=O). ESI-MS:  $m/z$  = 257.2 [M+H]<sup>+</sup>.

**(E)-2-(3,5-dimethyl-1H-pyrazol-1-yl)-N'-(4-methoxybenzylidene)acetohydrazide (M38) :**

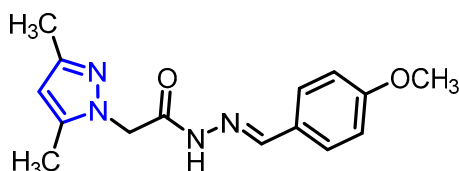

Yield 60% (solid), m.p : 185-187 °C ; FT-IR (ATR,  $\nu(\text{cm}^{-1})$ ) : 3114 (NH), 1676 (C=O), 1606 (C=N);  $^1\text{H}$  NMR: (300MHz, DMSO- $d_6$ ,  $\delta(\text{ppm})$ ) : 2.05 (s, 3H, CH<sub>3</sub>), 2.12 (s, 3H, CH<sub>3</sub>), 3.78 (s, 3H, OCH<sub>3</sub>), 5.15 (s, 2H, N-CH<sub>2</sub>-), 5.79 (1H, s, CH-pyrazole), 6.98 (d, J=8.7Hz, 2H, H-Ar), 7.63 (d, J=8.7Hz, 2H, H-Ar), 8.14 (1H, s, N=CH), 11.44 (s, 1H, NHCO);  $^{13}\text{C}$  NMR: (75MHz, DMSO- $d_6$ ,  $\delta$  (ppm)): 11.60 (CH<sub>3</sub>), 13.72 (CH<sub>3</sub>), 49.96 (OCH<sub>3</sub>), 50.77 (-CH<sub>2</sub>), 105.30 (CH, C4-pyrazole), 114.78 (CH, C-Ar), 127.03 (CH, C-Ar), 140.54 (C, C5-pyrazole), 144.32 (CH, N=CH), 147.82 (C, C3-pyrazole), 163.75 (C-OCH<sub>3</sub>), 168.77 (C, C=O). ESI-MS:  $m/z$  = 287.2 [M+H]<sup>+</sup>.

**(E)-2-(3,5-dimethyl-1H-pyrazol-1-yl)-N'-(4-(dimethylamino)benzylidene)acetohydrazide (M39) :**

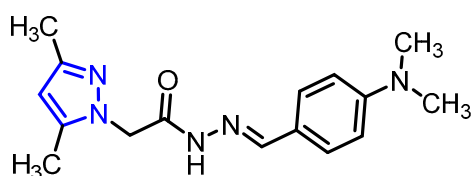

Yield 96% (solid), m.p : 212-214 °C ; FT-IR (ATR,  $\nu(\text{cm}^{-1})$ ) : 3192 (NH), 1675 (C=O), 1608 (C=N);  $^1\text{H}$  NMR: (300MHz, DMSO- $d_6$ ,  $\delta(\text{ppm})$ ) : 2.05 (s, 3H, CH<sub>3</sub>), 2.12 (s, 3H, CH<sub>3</sub>), 2.94 (s, 6H, N(CH<sub>3</sub>)<sub>2</sub>), 5.13 (s, 2H, N-CH<sub>2</sub>-), 5.79 (1H, s, CH-pyrazole), 6.71 (d, J=9.0Hz, 2H, H-Ar), 7.48 (d, J=9.0Hz, 2H, H-Ar), 8.05 (1H, s, N=CH), 11.39 (s, 1H, NHCO);  $^{13}\text{C}$  NMR:

(75MHz, DMSO-d<sub>6</sub>,  $\delta$  (ppm)): 11.09 (CH<sub>3</sub>), 13.73 (CH<sub>3</sub>), 49.94 (N(CH<sub>3</sub>)<sub>2</sub>), 50.84 (-CH<sub>2</sub>), 105.15 (CH, C4-pyrazole), 112.25 (CH, C-Ar), 121.73 (C-Ar), 128.66 (CH, C-Ar), 140.53 (C, C5-pyrazole), 144.25(CH, N=CH), 144.45 (C, C3-pyrazole), 152.05 (C-N(CH<sub>3</sub>)<sub>2</sub>), 168.39 (C, C=O). ESI-MS: m/z = 300.01 [M+H]<sup>+</sup>.

**(E)-2-(3,5-dimethyl-1H-pyrazol-1-yl)-N'-(4-nitrobenzylidene)acetohydrazide (M40) :**

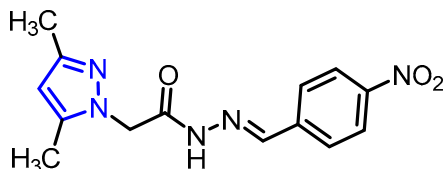

Yield 80% (solid), m.p : 199-201 °C ; FT-IR (ATR,  $\nu$ (cm<sup>-1</sup>)) : 3393 (NH), 1679 (C=O), 1618 (C=N); <sup>1</sup>H NMR: (300MHz, DMSO-d<sub>6</sub>,  $\delta$ (ppm)) : 2.05 (s, 3H, CH<sub>3</sub>), 2.13 (s, 3H, CH<sub>3</sub>), 5.24 (s, 2H, N-CH<sub>2</sub>-), 5.81 (1H, s, CH-pyrazole), 7.97 (d, J=9.0Hz, 2H, H-Ar), 8.26 (d, J=9.0Hz, 2H, H-Ar), 8.32 (1H, s, N=CH), 11.91 (s, 1H, NHCO); <sup>13</sup>C NMR: (75MHz, DMSO-d<sub>6</sub>,  $\delta$  (ppm)): 11.05 (CH<sub>3</sub>), 13.73 (CH<sub>3</sub>), 50.83 (-CH<sub>2</sub>), 105.26 (CH, C4-pyrazole), 124.47 (CH, C-Ar), 128.55 (CH, C-Ar), 140.59 (C-Ar), 144.45 (C, C5-pyrazole), 145.54 (CH, N=CH), 146.78 (C, C3-pyrazole), 148.41 (C-NO<sub>2</sub>), 169.50 (C, C=O). ESI-MS: m/z = 302.2 [M+H]<sup>+</sup>.

**(E)-N'-(2-chlorobenzylidene)-2-(3,5-dimethyl-1H-pyrazol-1-yl)acetohydrazide (M41) :**

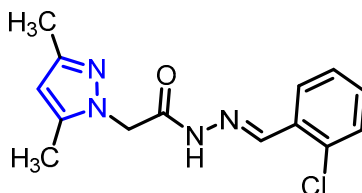

Yield 67% (solid), m.p : 283-285 °C; FT-IR (ATR,  $\nu$ (cm<sup>-1</sup>)) : 3223 (NH), 1673 (C=O), 1596 (C=N); <sup>1</sup>H NMR: (300MHz, DMSO-d<sub>6</sub>,  $\delta$ (ppm)) : 2.05 (s, 3H, CH<sub>3</sub>), 2.12 (s, 3H, CH<sub>3</sub>), 5.20 (s, 2H, N-CH<sub>2</sub>-), 5.80 (1H, s, CH-pyrazole), 7.37-7.8.03 (m, 4H, H-Ar), 8.39 (1H, s, N=CH), 11.78 (s, 1H, NHCO); <sup>13</sup>C NMR: (75MHz, DMSO-d<sub>6</sub>,  $\delta$  (ppm)): 11.04 (CH<sub>3</sub>), 13.73 (CH<sub>3</sub>), 50.86 (-CH<sub>2</sub>), 105.36 (CH, C4-pyrazole), 127.50 (CH, C-Ar), 128.12 (CH, C-Ar), 131.71 (CH, C-Ar), 131.87 (CH, C-Ar), 132.10 (C-Cl), 133.44 (C-Ar), 140.56 (C, C5-pyrazole), 143.86 (CH, N=CH), 146.76 (C, C3-pyrazole), 169.23 (C, C=O). ESI-MS: m/z = 290.8 [M+H]<sup>+</sup>.

**(E)-N'-(2,4-dichlorobenzylidene)-2-(3,5-dimethyl-1H-pyrazol-1-yl)acetohydrazide (M42) :**

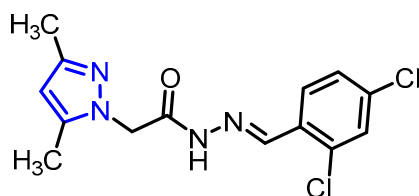

Yield 67% (solid), m.p : 203-205 °C ; FT-IR (ATR,  $\nu(\text{cm}^{-1})$ ) : 3413 (NH), 1681 (C=O), 1605 (C=N);  $^1\text{H}$  NMR: (300MHz, DMSO- $\text{d}_6$ ,  $\delta(\text{ppm})$ ) : 2.05 (s, 3H,  $\text{CH}_3$ ), 2.12 (s, 3H,  $\text{CH}_3$ ), 5.20 (s, 2H, N- $\text{CH}_2$ -), 5.80 (1H, s, CH-pyrazole), 7.48 (d,  $J=8.4\text{Hz}$ , 1H, H-Ar), 7.48 (s, 1H, H-Ar), 8.02 (d,  $J=8.4\text{Hz}$ , 1H, H-Ar), 8.55 (1H, s, N=CH), 11.82 (s, 1H, NHCO);  $^{13}\text{C}$  NMR: (75MHz, DMSO- $\text{d}_6$ ,  $\delta$  (ppm)): 11.03 ( $\text{CH}_3$ ), 13.71 ( $\text{CH}_3$ ), 50.85 ( $-\text{CH}_2$ ), 105.39 (CH, C4-pyrazole), 128.53 (CH, C-Ar), 128.73 (C-Cl), 129.82 (CH, C-Ar), 130.83 (CH, C-Ar), 134.34 (C-Cl), 135.72 (C-Ar), 140.57 (C, C5-pyrazole), 142.83 (CH, N=CH), 146.80 (C, C3-pyrazole), 169.29 (C, C=O). ESI-MS:  $m/z = 326.8$   $[\text{M}+\text{H}]^+$ .

**(E)-N'-(2-bromo-5-hydroxybenzylidene)-2-(3,5-dimethyl-1H-pyrazol-1-yl)acetohydrazide (M43) :**

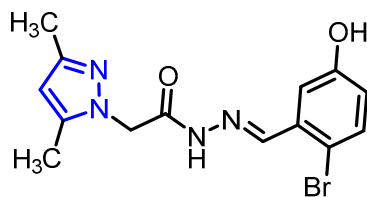

Yield 91% (solid), m.p : 271-273 °C ; FT-IR (ATR,  $\nu(\text{cm}^{-1})$ ) : 3153 (NH), 1674 (C=O), 1609 (C=N);  $^1\text{H}$  NMR: (300MHz, DMSO- $\text{d}_6$ ,  $\delta(\text{ppm})$ ) : 2.05 (s, 3H,  $\text{CH}_3$ ), 2.18 (s, 3H,  $\text{CH}_3$ ), 5.18 (s, 2H, N- $\text{CH}_2$ -), 5.79 (1H, s, CH-pyrazole), 6.86 (d,  $J=8.7\text{Hz}$ , 1H, H-Ar), 7.48 (dd,  $J=8.7\text{Hz}$ ,  $J=2.4\text{Hz}$ , 1H, H-Ar), 7.66 (d,  $J=2.4\text{Hz}$ , 1H, H-Ar), 8.61 (1H, s, N=CH), 11.38 (s, 1H, OH), 12.04 (s, 1H, NHCO);  $^{13}\text{C}$  NMR: (75MHz, DMSO- $\text{d}_6$ ,  $\delta$  (ppm)): 11.04 ( $\text{CH}_3$ ), 13.73 ( $\text{CH}_3$ ), 50.67 ( $-\text{CH}_2$ ), 105.18 (CH, C4-pyrazole), 110.92 (C-Br), 128.73 (CH, C-Ar), 118.87 (CH, C-Ar), 121.63 (C-Ar), 128.37 (CH, C-Ar), 134.17 (CH, C-Ar), 140.52 (C, C5-pyrazole), 145.72 (CH, N=CH), 152.02 (C, C3-pyrazole), 164.09 (C-OH), 168.97 (C, C=O). ESI-MS:  $m/z = 352.1$   $[\text{M}+\text{H}]^+$ .

**(E)-2-(3,5-dimethyl-1H-pyrazol-1-yl)-N'-(furan-2-ylmethylene)acetohydrazide (M44) :**

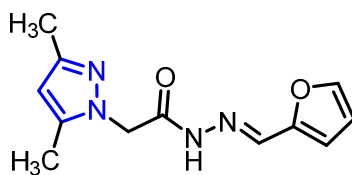

Yield 66% (solid), m.p : 178-180 °C ; FT-IR (ATR,  $\nu(\text{cm}^{-1})$ ) : 3211 (NH), 1675 (C=O), 1615 (C=N);  $^1\text{H}$  NMR: (300MHz, DMSO- $\text{d}_6$ ,  $\delta(\text{ppm})$ ) : 2.04 (s, 3H,  $\text{CH}_3$ ), 2.12 (s, 3H,  $\text{CH}_3$ ), 5.09 (s, 2H, N- $\underline{\text{CH}_2}$ -), 5.79 (1H, s, CH-pyrazole), 6.59-6.61 (m, 3H, H-Ar), 8.09 (1H, s, N=CH), 11.54 (s, 1H, NHCO);  $^{13}\text{C}$  NMR: (75MHz, DMSO- $\text{d}_6$ ,  $\delta$  (ppm)): 11.03, 13.72, 50.81, 105.34, 112.63 (C-Br), 114.40, 137.73, 140.61, 145.75, 146.69, 149.58, 168.82. ESI-MS:  $m/z$  = 247.1  $[\text{M}+\text{H}]^+$ .

**(E)-2-(3,5-dimethyl-1H-pyrazol-1-yl)-N'-(4-methylbenzylidene)acetohydrazide (M45) :**

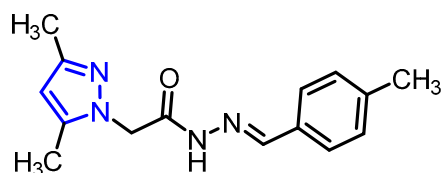

Yield 65% (solid), m.p : 188-190 °C ; FT-IR (ATR,  $\nu(\text{cm}^{-1})$ ) : 3425 (NH), 1678 (C=O), 1619 (C=N);  $^1\text{H}$  NMR: (300MHz, DMSO- $\text{d}_6$ ,  $\delta(\text{ppm})$ ) : 2.05 (s, 3H,  $\text{CH}_3$ ), 2.12 (s, 3H,  $\text{CH}_3$ ), 2.31 (s, 3H,  $\text{CH}_3$ ), 5.17 (s, 2H, N- $\underline{\text{CH}_2}$ -), 5.79 (1H, s, CH-pyrazole), 7.23 (d,  $J=7.8\text{Hz}$ , 2H, H-Ar), 7.57 (d,  $J=7.8\text{Hz}$ , 2H, H-Ar), 8.16 (1H, s, N=CH), 11.52 (s, 1H, NHCO);  $^{13}\text{C}$  NMR: (75MHz, DMSO- $\text{d}_6$ ,  $\delta$  (ppm)): 11.05 ( $\text{CH}_3$ ), 13.81 ( $\text{CH}_3$ ), 19.94 ( $\text{CH}_3$ ), 50.95 ( $-\text{CH}_2$ ), 105.45 (CH, C4-pyrazole), 112.63 (CH, C-Ar), 122.73 (CH, C-Ar), 128.66 (CH, C-Ar), 140.53 (C, C5-pyrazole), 144.75 (C, C3-pyrazole), 146.22 (CH, N=CH), 150.05 (C- $\text{CH}_3$ ), 169.30 (C, C=O). ESI-MS:  $m/z$  = 271.0  $[\text{M}+\text{H}]^+$ .

**(E)-N'-(4-chlorobenzylidene)-2-(3,5-dimethyl-1H-pyrazol-1-yl)acetohydrazide (M46) :**

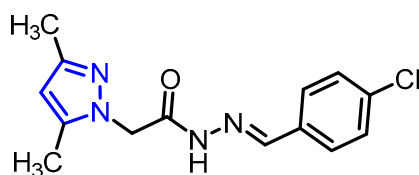

Yield 57% (solid), m.p : 174-176 °C ; FT-IR (ATR,  $\nu(\text{cm}^{-1})$ ) : 3397 (NH), 1677 (C=O), 1618 (C=N);  $^1\text{H}$  NMR: (300MHz, DMSO- $\text{d}_6$ ,  $\delta(\text{ppm})$ ) : 2.05 (s, 3H,  $\text{CH}_3$ ), 2.12 (s, 3H,  $\text{CH}_3$ ), 5.18 (s, 2H, N- $\underline{\text{CH}_2}$ -), 5.80 (1H, s, CH-pyrazole), 7.48 (d,  $J=8.7\text{Hz}$ , 2H, H-Ar), 7.73 (d,  $J=8.7\text{Hz}$ , 2H, H-Ar), 8.20 (1H, s, N=CH), 11.67 (s, 1H, NHCO);  $^{13}\text{C}$  NMR: (75MHz, DMSO- $\text{d}_6$ ,  $\delta$  (ppm)): 11.05 ( $\text{CH}_3$ ), 13.73 ( $\text{CH}_3$ ), 50.81 ( $-\text{CH}_2$ ), 105.33 (CH, C4-pyrazole), 129.06 (CH, C-Ar), 129.33 (CH, C-Ar), 133.48 (C-Ar), 135.09 (C-Cl), 140.55 (C, C5-pyrazole), 143.15 (C, C3-pyrazole), 146.64 (CH, N=CH), 169.13 (C, C=O). ESI-MS:  $m/z$  = 291.0  $[\text{M}+\text{H}]^+$ .

**(E)-2-(3,5-dimethyl-1H-pyrazol-1-yl)-N'-(4-fluorobenzylidene)acetohydrazide (47) :**

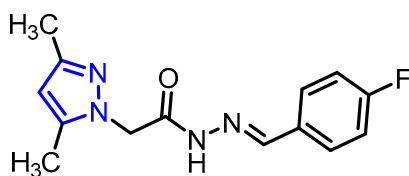

Yield 94% (solid), m.p : 182-184 °C ; FT-IR (ATR,  $\nu(\text{cm}^{-1})$ ) : 3336 (NH), 1677 (C=O), 1619 (C=N);  $^1\text{H}$  NMR: (300MHz, DMSO- $\text{d}_6$ ,  $\delta(\text{ppm})$ ) : 2.05 (s, 3H, CH<sub>3</sub>), 2.18 (s, 3H, CH<sub>3</sub>), 5.18 (s, 2H, N-CH<sub>2</sub>-), 5.80 (1H, s, CH-pyrazole), 7.24 (d, J=8.7Hz, 2H, H-Ar), 7.78 (d, J=8.7Hz, 2H, H-Ar), 8.00 (1H, s, N=CH), 11.60 (s, 1H, NHCO);  $^{13}\text{C}$  NMR: (75MHz, DMSO- $\text{d}_6$ ,  $\delta$  (ppm)): 11.05 (CH<sub>3</sub>), 13.73 (CH<sub>3</sub>), 50.80 (-CH<sub>2</sub>), 105.20 (CH, C4-pyrazole), 116.74 (CH, C-Ar), 129.85 (CH, C-Ar), 131.05 (C-Ar), 140.54 (C, C5-pyrazole), 143.25 (C, C3-pyrazole), 146.81 (CH, N=CH), 165.14 (C-Cl), 169.05 (C, C=O). ESI-MS: m/z = 275.1 [M+H]<sup>+</sup>.

**(E)-2-(3,5-dimethyl-1H-pyrazol-1-yl)-N'-(4-hydroxy-3-methoxybenzylidene)acetohydrazide (M48) :**

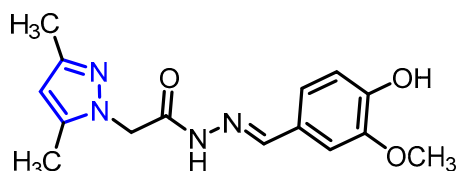

Yiel 69% (solid), m.p : 210-212 °C, FT-IR (ATR,  $\nu(\text{cm}^{-1})$ ) : 3215 (NH), 1673 (C=O), 1588 (C=N);  $^1\text{H}$  NMR: (300MHz, DMSO- $\text{d}_6$ ,  $\delta(\text{ppm})$ ) : 2.05 (s, 3H, CH<sub>3</sub>), 2.18 (s, 3H, CH<sub>3</sub>), 3.80 (s, 3H, OCH<sub>3</sub>), 5.17 (s, 2H, N-CH<sub>2</sub>-), 5.79 (1H, s, CH-pyrazole), 6.80 (d, J=8.4Hz, 2H, H-Ar), 7.26 (d, J=8.4Hz, 2H, H-Ar), 7.88 (s, 2H, H-Ar), 8.08 (1H, s, N=CH), 9.50 (1H, s, OH), 11.42 (s, 1H, NHCO);  $^{13}\text{C}$  NMR: (75MHz, DMSO- $\text{d}_6$ ,  $\delta$  (ppm)): 11.09 (CH<sub>3</sub>), 13.72 (CH<sub>3</sub>), 50.83 (-CH<sub>2</sub>), 56.03 (-CH<sub>2</sub>), 105.29 (CH, C4-pyrazole), 109.77 (CH, C-Ar), 115.92 (CH, C-Ar), 122.51 (CH, C-Ar), 125.88 (C-Ar), 140.53 (C, C5-pyrazole), 146.62 (C, C3-pyrazole), 148.45 (CH, N=CH), 149.52 (C-OCH<sub>3</sub>), 163.64 (C-OH), 168.71 (C, C=O). ESI-MS: m/z = 303.1 [M+H]<sup>+</sup>.

**(E)-N'-(4-bromobenzylidene)-2-(3,5-dimethyl-1H-pyrazol-1-yl)acetohydrazide (M49) :**

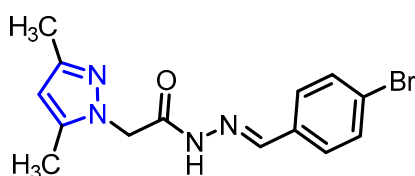

Yield 57% (solid), m.p : 196-198 °C ; FT-IR (ATR,  $\nu(\text{cm}^{-1})$ ) : 3296 (NH), 1677 (C=O), 1617 (C=N);  $^1\text{H}$  NMR: (300MHz, DMSO- $\text{d}_6$ ,  $\delta(\text{ppm})$ ) : 2.05 (s, 3H, CH<sub>3</sub>), 2.17 (s, 3H, CH<sub>3</sub>), 5.18 (s, 2H, N-CH<sub>2</sub>-), 5.80 (1H, s, CH-pyrazole), 7.61 (d, J=9.0Hz, 2H, H-Ar), 7.66 (d, J=9.0Hz, 2H, H-Ar), 8.18 (1H, s, N=CH), 11.68 (s, 1H, NHCO);  $^{13}\text{C}$  NMR: (75MHz, DMSO- $\text{d}_6$ ,  $\delta$

(ppm)): 11.05 (CH<sub>3</sub>), 13.73 (CH<sub>3</sub>), 50.81 (-CH<sub>2</sub>), 105.33 (CH, C4-pyrazole), 123.65 (C-Br), 129.46 (CH, C-Ar), 133.73 (CH, C-Ar), 133.82 (C-Ar), 140.56 (C, C5-pyrazole), 143.25 (C, C3-pyrazole), 146.72(CH, N=CH), 169.14 (C, C=O). ESI-MS:  $m/z = 335.2 [M+H]^+$ .

**(E)-2-(3,5-dimethyl-1H-pyrazol-1-yl)-N'-(1-phenylethylidene)acetohydrazide (M50) :**

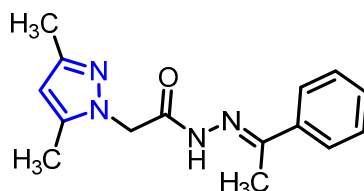

Yield 94% (solid) ; m.p : 155-157 °C ; FT-IR (ATR,  $\nu(\text{cm}^{-1})$ ) : 3204 (NH), 1680 (C=O), 1653 (C=N); <sup>1</sup>H NMR: (300MHz, DMSO-d<sub>6</sub>,  $\delta(\text{ppm})$ ) : 2.06 (s, 3H,CH<sub>3</sub>), 2.18 (s, 3H, CH<sub>3</sub>), 5.22 (s, 2H, N-CH<sub>2</sub>-), 5.80 (1H, s, CH-pyrazole), 7.38-7.82 (m, 5H, H-Ar), 10.84 (s, 1H, NHCO); <sup>13</sup>C NMR: (75MHz, DMSO-d<sub>6</sub>,  $\delta$  (ppm)): 10.06, 13.74, 14.64, 50.58, 105.22, 126.81, 128.84, 129.65, 138.45, 140.80, 146.68, 149.02, 169.89. ESI-MS:  $m/z = 271.1 [M+H]^+$ .

**4-amino-5-(5-methyl-1H-pyrazol-3-yl)-4H-1,2,4-triazole-3-thiol (M53):**

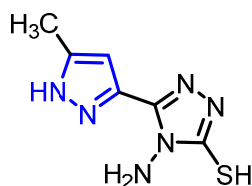

Yield 67% (solid); mp : 216-218 °C; FT-IR (ATR,  $\nu(\text{cm}^{-1})$ ): 3144-3367 (NH, NH<sub>2</sub>), 2732 (SH); <sup>1</sup>H NMR: (300 MHz, DMSO-d<sub>6</sub>,  $\delta$  (ppm)): 2.26 (3H, s, CH<sub>3</sub>), 5.98 (2H, s, NH<sub>2</sub>), 6.63 (1H, s, CH-pyrazole), 13.10 (1H, s, NH-pz), 13.75 (1H, s, SH); <sup>13</sup>C NMR: (75 MHz, DMSO-d<sub>6</sub>,  $\delta$  (ppm)): 10.69 (CH<sub>3</sub>), 105.08 (CH, C4-pyrazole), 138.64 (C, C3-pyrazole), 139.90 (C, C5-pyrazole), 155.40 (C, C5-triazole), 165.06 (C, C-SH). ESI-MS:  $m/z = 197.0 [M+H]^+$ .

**4-amino-5-(5-phenyl-1H-pyrazol-3-yl)-4H-1,2,4-triazole-3-thiol (M54):**

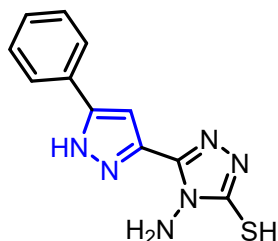

Yield 76% (solid); mp = 287-289 °C; FT-IR (ATR,  $\nu(\text{cm}^{-1})$ ): 3133-3277 (NH, NH<sub>2</sub>), 2741 (SH); <sup>1</sup>H NMR: (300 MHz, DMSO-d<sub>6</sub>,  $\delta$  (ppm)): 5.85 (2H, s, NH<sub>2</sub>), 5.95 (1H, s, CH-pyrazole), 7.28-7.83 (m, 5H, H-Ar), 13.80 (1H, s, NH-pz), 14.05 (1H, s, SH); <sup>13</sup>C NMR: (75

MHz, DMSO-*d*<sub>6</sub>,  $\delta$  (ppm)): 103.57, 128.80, 128.35, 129.14, 133.25, 142.94, 145.07, 151.40, 165.42 (C, C-SH). ESI-MS:  $m/z$  = 259.0 [M+H]<sup>+</sup>.

**4-amino-5-((3,5-dimethyl-1H-pyrazol-1-yl)methyl)-4H-1,2,4-triazole-3-thiol (M56):**

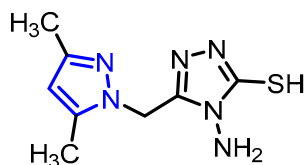

Yield 67 % (solid); m.p: 287-289 °C; FT-IR (ATR,  $\nu(\text{cm}^{-1})$ ) : 3188 (NH<sub>2</sub>), 2722 (SH); <sup>1</sup>H NMR: (300MHz, DMSO-*d*<sub>6</sub>,  $\delta(\text{ppm})$ ) : 2.02 (s, 3H, -CH<sub>3</sub>), 2.23 (s, 3H, CH<sub>3</sub>), 5.19 (s, 2H, N-CH<sub>2</sub>-), 5.56 (s, 2H, NH<sub>2</sub>), 5.81 (s, 1H, CH-pyrazole); <sup>13</sup>C NMR: (75MHz, DMSO-*d*<sub>6</sub>,  $\delta(\text{ppm})$ ) : 11.08 (-CH<sub>3</sub>), 13.73 (CH<sub>3</sub>), 42.75 (N-CH<sub>2</sub>), 105.58 (CH), 140.33 (C); 140.40 (C, C5-pyrazole), 147.22 (C, C5-pyrazole), 148.77 (C, C-SH), 166.78 (CO); ESI-MS:  $m/z$  = 225.1 [M+H]<sup>+</sup>.

**(E)-4-((4-(dimethylamino)benzylidene)amino)-5-(5-methyl-1H-pyrazol-3-yl)-4H-1,2,4-triazole-3-thiol (M59):**

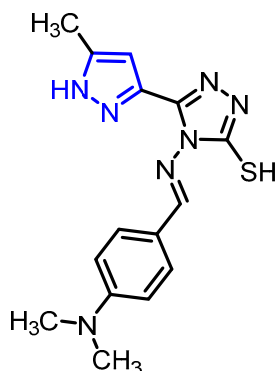

Yield 81% (solid); m.p: 201-203 °C; IR ( $\nu(\text{cm}^{-1})$ ): 3143 (NH), 1583 (C=N); <sup>1</sup>H NMR: (300MHz, DMSO-*d*<sub>6</sub>,  $\delta(\text{ppm})$ ) : 2.23 (3H, s, CH<sub>3</sub>), 3.01 (6H, s, N(CH<sub>3</sub>)<sub>2</sub>), 6.42 (1H, s, CH-pyrazole), 6.79 (2H, d, J = 8.7Hz, Ar-H), 7.69 (2H, d, J = 8.7 Hz, Ar-H), 8.96 (1H, s, N=CH), 13.06 (1H, s, NH-pyrazole), 13.90 (1H, s, SH); <sup>13</sup>C NMR: (75MHz, DMSO-*d*<sub>6</sub>,  $\delta(\text{ppm})$ ): 10.66 (CH<sub>3</sub>), 49.64 (N(CH<sub>3</sub>)<sub>2</sub>), 105.30 (CH, C4-pyrazole), 112.01 (CH, C3-Ar), 119.12 (C, C1-Ar), 131.10 (CH, C2-Ar), 138.49 (C, C5-pyrazole), 139.81 (C, C3-pyrazole), 145.53 (C, C5-triazole), 153.73 (C, C4-Ar), 162.51 (CH, N=CH), 168.99 (C, C-SH). ESI-MS:  $m/z$  = 328.0 [M+H]<sup>+</sup>,  $m/z$  = 350.5 [M+Na]<sup>+</sup>.

**(E)-4-bromo-3-(((3-mercapto-5-(5-methyl-1H-pyrazol-3-yl)-4H-1,2,4-triazol-4-yl)imino)methyl)phenol (M63):**

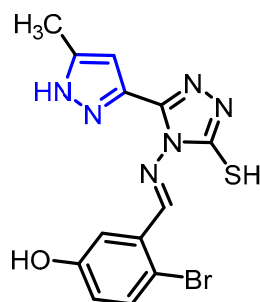

Yield 63% (solid); m.p: 272-274 °C; FT-IR (ATR,  $\nu(\text{cm}^{-1})$ ) : 3213 (NH), 1571 (C=N);  $^1\text{H}$  NMR: (300MHz,  $\text{DMSO-d}_6$ ,  $\delta(\text{ppm})$ ) : 2.25 (s, 3H,  $\text{CH}_3$ ), 6.48 (s, 1H, CH-pyrazole), 6.95 (d,  $J = 7.8$  Hz, 2H, Ar-H), 7.58 (d,  $J = 7.8$  Hz, 2H, Ar-H), 9.83 (s, 1H, OH), 10.92 (1H, s, N=CH), 11.17 (1H, s, NH-pyrazole), 14.09 (1H, s, SH);  $^{13}\text{C}$  NMR: (75MHz,  $\text{DMSO-d}_6$ ,  $\delta(\text{ppm})$ ): 10.6, 105.2, 111.1, 119.6, 120.4, 130.7, 135.4, 136.9, 140.1, 144.9, 156.8, 158.0, 162.3. ESI-MS:  $m/z = 380.4$   $[\text{M}+\text{H}]^+$ .

**(E)-5-(5-methyl-1H-pyrazol-3-yl)-4-((4-methylbenzylidene)amino)-4H-1,2,4-triazole-3-thiol (M64):**

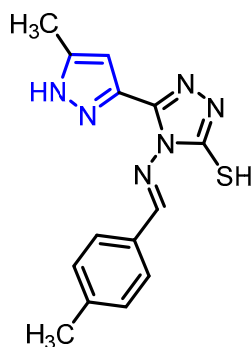

Yield 72% (solid); m.p: 357-359 °C; FT-IR (ATR,  $\nu(\text{cm}^{-1})$ ) : 3212 (NH), 1572 (C=N);  $^1\text{H}$  NMR: (300MHz,  $\text{DMSO-d}_6$ ,  $\delta(\text{ppm})$ ) : 2.23 (3H, s,  $\text{CH}_3$ ), 2.38 (3H, s,  $\text{CH}_3$ ), 6.45 (1H, s, CH-pyrazole), 7.36 (2H, d,  $J = 7.8$  Hz, Ar-H), 7.79 (2H, d,  $J = 7.8$  Hz, Ar-H), 9.34 (1H, s, N=CH), 13.08 (1H, s, NH-pyrazole), 14.02 (1H, s, SH);  $^{13}\text{C}$  NMR: (75MHz,  $\text{DMSO-d}_6$ ,  $\delta(\text{ppm})$ ): 10.64 ( $\text{CH}_3$ ), 21.74 ( $\text{CH}_3$ ), 105.35 (CH, C4-pyrazole), 129.35 (CH, C3-Ar), 130.23 (C, C1-Ar), 138.37 (CH, C2-Ar), 139.96 (C, C5-pyrazole), 143.70 (C, C3-pyrazole), 144.85 (C, C5-triazole), 162.47 (CH, N=CH), 168.60 (C, C-SH). ESI-MS:  $m/z = 299.1$   $[\text{M}+\text{H}]^+$ ,  $m/z = 321.1$   $[\text{M}+\text{Na}]^+$ .

**(E)-4-(((3-mercapto-5-(5-methyl-1H-pyrazol-3-yl)-4H-1,2,4-triazol-4-yl)imino)methyl)-2-methoxyphenol (M67):**



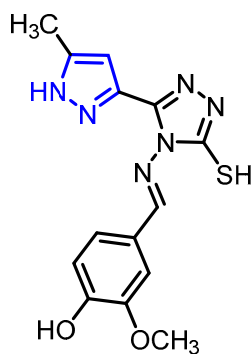

Yield 71% (solid); m.p: 250-252 °C; FT-IR (ATR,  $\nu(\text{cm}^{-1})$ ) : 3214 (NH), 1573 (C=N);  $^1\text{H}$  NMR: (300MHz,  $\text{DMSO-}d_6$ ,  $\delta(\text{ppm})$ ) : 2.23 (3H, s,  $\text{CH}_3$ ), 3.18 (3H, s,  $\text{OCH}_3$ ), 6.45 (1H, s, CH-pyrazole), 6.92 (2H, d,  $J = 8.1$  Hz, Ar-H), 7.33 (2H, d,  $J = 8.1$  Hz, Ar-H), 7.47 (s, 1H, H(Ar)), 9.13 (1H, s,  $\text{N}=\text{CH}$ ), 10.04 (s, 1H, OH), 13.40 (1H, s, NH-pyrazole), 13.97 (1H, s, SH);  $^{13}\text{C}$  NMR: (75MHz,  $\text{DMSO-}d_6$ ,  $\delta(\text{ppm})$ ): 10.64, 56.11, 105.37, 111.23, 116.13, 123.75, 125.00, 138.42, 139.93, 144.81, 148.58, 151.98, 162.48, 168.79. ESI-MS:  $m/z = 331.2$   $[\text{M}+\text{H}]^+$ .

**(E)-4-(benzylideneamino)-5-(5-phenyl-1H-pyrazol-3-yl)-4H-1,2,4-triazole-3-thiol (M69):**

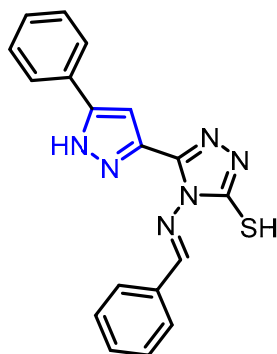

Yield 70% (solid); m.p: 240-242 °C; FT-IR (ATR,  $\nu(\text{cm}^{-1})$ ) : 3107 (NH), 1596 (C=N);  $^1\text{H}$  NMR: (300MHz,  $\text{DMSO-}d_6$ ,  $\delta(\text{ppm})$ ) : 7.16 (1H, s, CH-pyrazole), 6.34-8.76 (m, 10H, Ar-H), 9.78 (1H, s,  $\text{N}=\text{CH}$ ), 14.20 (1H, s, NH-pyrazole), 14.40 (1H, s, SH);  $^{13}\text{C}$  NMR: (75MHz,  $\text{DMSO-}d_6$ ,  $\delta(\text{ppm})$ ): 103.72, 125.78, 129.14, 129.38, 129.58, 129.68, 132.46, 133.38, 139.35, 143.63, 144.51, 162.64, 168.78. ESI-MS:  $m/z = 347.1$   $[\text{M}+\text{H}]^+$ .

**(E)-4-(((4-(dimethylamino)benzylidene)amino)-5-(5-phenyl-1H-pyrazol-3-yl)-4H-1,2,4-triazole-3-thiol (M71):**

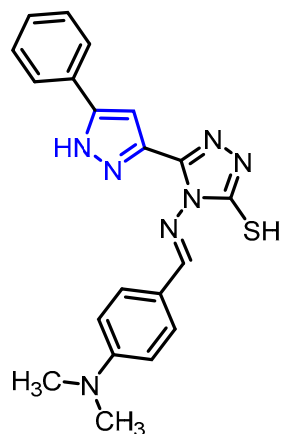

Yield 78% (solid); m.p: 290-292 °C; FT-IR (ATR,  $\nu(\text{cm}^{-1})$ ) : 3194 (NH), 1599 (C=N);  $^1\text{H}$  NMR: (300MHz,  $\text{DMSO}-d_6$ ,  $\delta(\text{ppm})$ ) : 2.98 (s, 6H,  $\text{N}(\text{CH}_3)_2$ ), 6.72 (1H, s, CH-pyrazole), 6.98 (d,  $J=8.7\text{Hz}$ , 2H, Ar-H), 7.63 (d,  $J=8.7\text{Hz}$ , 2H, Ar-H), 7.66-7.83 (m, 5H, H-Ar), 9.38 (1H, s, N=CH), 13.65 (1H, s, NH-pyrazole), 14.06 (1H, s, SH);  $^{13}\text{C}$  NMR: (75MHz,  $\text{DMSO}-d_6$ ,  $\delta(\text{ppm})$ ): 46.0, 103.89, 112.55, 122.77, 126.01, 128.22, 128.95, 129.32, 131.12, 134.35, 148.62, 151.31, 152.90, 155.43, 160.13. ESI-MS:  $m/z = 390.0$   $[\text{M}+\text{H}]^+$ .

**(E)-4-((2-chlorobenzylidene)amino)-5-(5-phenyl-1H-pyrazol-3-yl)-4H-1,2,4-triazole-3-thiol (M72):**

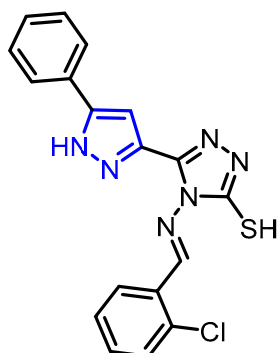

Yield 89% (solid), m.p: 312-314 °C; FT-IR (ATR,  $\nu(\text{cm}^{-1})$ ) : 3118 (NH), 1593 (C=N);  $^1\text{H}$  NMR: (300MHz,  $\text{DMSO}-d_6$ ,  $\delta(\text{ppm})$ ) : 7.20 (1H, s, CH-pyrazole), 7.34-8.20 (m, 9H, H-Ar), 10.18 (1H, s, N=CH), 13.95 (1H, s, NH-pyrazole), 14.24 (1H, s, SH);  $^{13}\text{C}$  NMR: (75MHz,  $\text{DMSO}-d_6$ ,  $\delta(\text{ppm})$ ): 104.07, 125.78, 128.52, 128.86, 129.14, 129.62, 130.17, 130.84, 134.64, 135.70, 139.28, 143.63, 144.92, 162.10 ; 162.44. ESI-MS:  $m/z = 381.0$   $[\text{M}+\text{H}]^+$ .

**(E)-4-((2,4-dichlorobenzylidene)amino)-5-(5-phenyl-1H-pyrazol-3-yl)-4H-1,2,4-triazole-3-thiol (M73):**

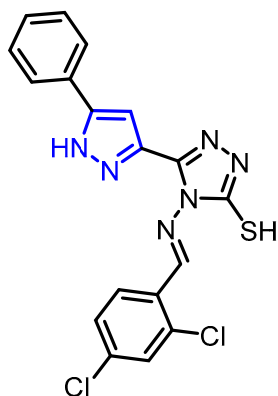

Yield 62% (solid); m.p: 317-319 °C; FT-IR (ATR,  $\nu(\text{cm}^{-1})$ ) : 3111 (NH), 1589 (C=N);  $^1\text{H}$  NMR: (300MHz,  $\text{DMSO}-d_6$ ,  $\delta(\text{ppm})$ ) : 7.20 (1H, s, CH-pyrazole), 7.34 (d,  $J=8.7\text{Hz}$ , 1H, Ar-H), 7.42-7.93 (m, 5H, H-Ar), 8.17 (d,  $J=8.7\text{Hz}$ , 1H, Ar-H), 8.75 (s, 1H, Ar-H), 10.24 (1H, s, N=CH), 13.99 (1H, s, NH-pyrazole), 14.08 (1H, s, SH);  $^{13}\text{C}$  NMR: (75MHz,  $\text{DMSO}-d_6$ ,  $\delta(\text{ppm})$ ): 104.33, 125.83, 128.94, 129.10, 129.27, 129.33, 129.42, 129.51, 129.65, 130.37, 136.51, 138.48, 145.35, 153.23, 160.98, 162.38. ESI-MS:  $m/z = 415.1$   $[\text{M}+\text{H}]^+$ .

**(E)-4-bromo-3-(((3-mercapto-5-(5-phenyl-1H-pyrazol-3-yl)-4H-1,2,4-triazol-4-yl)imino)methyl)phenol (M74):**

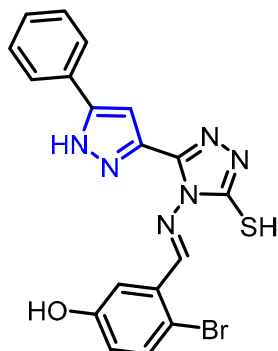

Yield 91% (solid); m.p: 271-273 °C; FT-IR (ATR,  $\nu(\text{cm}^{-1})$ ) : 3220 (NH), 1599 (C=N);  $^1\text{H}$  NMR: (300MHz,  $\text{DMSO}-d_6$ ,  $\delta(\text{ppm})$ ) : 6.91 (1H, s, CH-pyrazole), 7.34-7.90 (m, 8H, H-Ar), 8.90 (1H, s, N=CH), 13.93 (1H, s, NH-pyrazole), 14.19 (1H, s, SH);  $^{13}\text{C}$  NMR: (75MHz,  $\text{DMSO}-d_6$ ,  $\delta(\text{ppm})$ ): 103.86, 111.04, 119.38, 120.61, 125.79, 128.78, 129.17, 130.71, 132.09, 135.96, 136.97, 144.51, 153.45, 158.11, 161.29, 162.49. ESI-MS:  $m/z = 441.1$   $[\text{M}+\text{H}]^+$ .

**(E)-4-(((furan-2-ylmethylene)amino)-5-(5-phenyl-1H-pyrazol-3-yl)-4H-1,2,4-triazole-3-thiol (M75):**

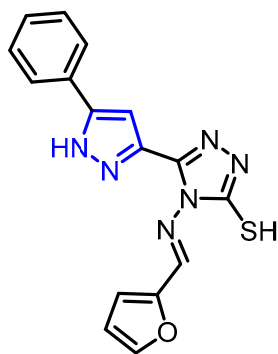

Yield 69% (solid); m.p: 326-328 °C; FT-IR (ATR,  $\nu(\text{cm}^{-1})$ ) : 3120 (NH), 1612 (C=N);  $^1\text{H}$  NMR: (300MHz,  $\text{DMSO}-d_6$ ,  $\delta(\text{ppm})$ ) : 6.78 (1H, s, CH-pyrazole), 7.16-8.07 (m, 8H, H-Ar), 9.35 (1H, s, N=CH), 13.02 (1H, s, NH-pyrazole), 13.98 (1H, s, SH);  $^{13}\text{C}$  NMR: (75MHz,  $\text{DMSO}-d_6$ ,  $\delta(\text{ppm})$ ): 103.53, 113.53, 121.03, 125.75, 125.95, 129.13, 129.61, 132.50, 142.12, 143.55, 147.75, 148.66, 156.34, 162.59. ESI-MS:  $m/z = 337.1$   $[\text{M}+\text{H}]^+$ .

**(E)-4-((4-methylbenzylidene)amino)-5-(5-phenyl-1H-pyrazol-3-yl)-4H-1,2,4-triazole-3-thiol (M76):**

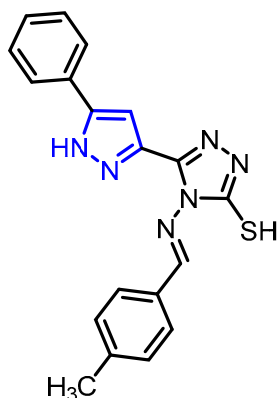

Yield 44% (solid); m.p: 339-341 °C; FT-IR (ATR,  $\nu(\text{cm}^{-1})$ ) : 3207 (NH), 1561 (C=N);  $^1\text{H}$  NMR: (300MHz,  $\text{DMSO}-d_6$ ,  $\delta(\text{ppm})$ ) : 3.54 (s, 3H,  $\text{CH}_3$ ), 6.92 (1H, s, CH-pyrazole), 7.25 (d,  $J = 8.1\text{Hz}$ , 2H, Ar-H), 7.36-7.46 (m, 5H, H-Ar), 7.82 (d,  $J = 8.1\text{Hz}$ , 2H, Ar-H), 9.45 (1H, s, N=CH), 12.98 (1H, s, NH-pyrazole), 13.65 (1H, s, SH);  $^{13}\text{C}$  NMR: (75MHz,  $\text{DMSO}-d_6$ ,  $\delta(\text{ppm})$ ): 21.65, 103.70, 126.80, 127.56, 128.54, 128.91, 129.05, 129.48, 132.19, 134.15, 140.33, 148.26, 152.90, 150.92, 155.11, 161.03. ESI-MS:  $m/z = 361.0$   $[\text{M}+\text{H}]^+$ .

**(E)-4-((4-chlorobenzylidene)amino)-5-(5-phenyl-1H-pyrazol-3-yl)-4H-1,2,4-triazole-3-thiol (M77):**

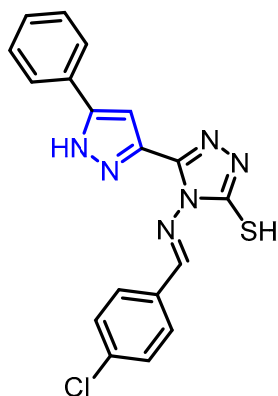

Yield 40% (solid); m.p: 319-321 °C; FT-IR (ATR,  $\nu(\text{cm}^{-1})$ ) : 3114 (NH), 1588 (C=N);  $^1\text{H}$  NMR: (300MHz,  $\text{DMSO}-d_6$ ,  $\delta(\text{ppm})$ ) : 7.16 (1H, s, CH-pyrazole), 7.18-7.41 (m, 5H, H-Ar), 7.77 (d,  $J=8.1\text{Hz}$ , 2H, Ar-H), 7.95 (d,  $J=8.1\text{Hz}$ , 2H, Ar-H), 9.53 (1H, s, N=CH), 13.93 (1H, s, NH-pyrazole), 14.19 (1H, s, SH);  $^{13}\text{C}$  NMR: (75MHz,  $\text{DMSO}-d_6$ ,  $\delta(\text{ppm})$ ): 103.74, 125.79, 128.40, 128.81, 129.55, 130.49, 131.40, 133.10, 138.02, 139.33, 144.51, 151.61, 162.68, 167.36. ESI-MS:  $m/z = 381.1$   $[\text{M}+\text{H}]^+$ .

**(E)-4-((4-fluorobenzylidene)amino)-5-(5-phenyl-1H-pyrazol-3-yl)-4H-1,2,4-triazole-3-thiol (M78):**

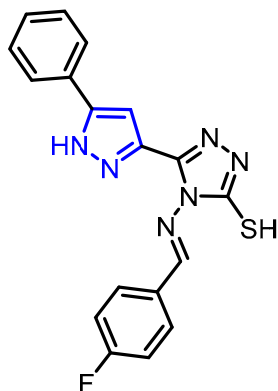

Yield 59% (solid); m.p: 301-303 °C; FT-IR (ATR,  $\nu(\text{cm}^{-1})$ ) : 3165 (NH), 1558 (C=N);  $^1\text{H}$  NMR: (300MHz,  $\text{DMSO}-d_6$ ,  $\delta(\text{ppm})$ ) : 7.21 (1H, s, CH-pyrazole), 7.38-8.03 (m, 9H, H-Ar), 9.27 (1H, s, N=CH), 13.23 (1H, s, NH-pyrazole), 14.15 (1H, s, SH);  $^{13}\text{C}$  NMR: (75MHz,  $\text{DMSO}-d_6$ ,  $\delta(\text{ppm})$ ): 103.16, 123.13, 125.44, 129.39, 129.51, 129.73, 129.92, 132.20, 134.15, 146.83, 152.03, 155.88, 162.23, 164.40. ESI-MS:  $m/z = 365.1$   $[\text{M}+\text{H}]^+$ .

**(E)-4-((4-bromobenzylidene)amino)-5-(5-phenyl-1H-pyrazol-3-yl)-4H-1,2,4-triazole-3-thiol (M79):**

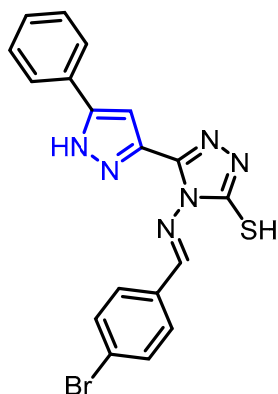

Yield 56% (solid); m.p: 285-287 °C; FT-IR (ATR,  $\nu(\text{cm}^{-1})$ ) : 3133 (NH), 1590 (C=N);  $^1\text{H}$  NMR: (300MHz,  $\text{DMSO-}d_6$ ,  $\delta(\text{ppm})$ ) : 7.16 (1H, s, CH-pyrazole), 7.34-7.48 (m, 5H, H-Ar), 7.77 (d,  $J = 8.4\text{Hz}$ , 2H, Ar-H), 7.88 (d,  $J = 8.4\text{Hz}$ , 2H, Ar-H), 9.52 (1H, s, N=CH), 13.90 (1H, s, NH-pyrazole), 14.18 (1H, s, SH);  $^{13}\text{C}$  NMR: (75MHz,  $\text{DMSO-}d_6$ ,  $\delta(\text{ppm})$ ): 103.75, 125.79, 127.08, 128.81, 129.15, 129.62, 131.14, 131.72, 132.18, 134.31, 145.53, 150.80, 162.65, 167.50. ESI-MS:  $m/z = 426.2$   $[\text{M}+\text{H}]^+$ .

**5-(5-methyl-1H-pyrazol-3-yl)-4-phenyl-2,4-dihydro-3H-1,2,4-triazol-3-one (M82):**

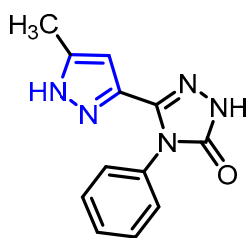

Yield 81% (solid); m.p: 368-370 °C; FT-IR (ATR,  $\nu(\text{cm}^{-1})$ ) : 3168-3406 (NH), 1655 (C=O);  $^1\text{H}$  NMR: (300MHz,  $\text{DMSO-}d_6$ ,  $\delta(\text{ppm})$ ) : 2.13 (s, 3H,  $\text{CH}_3$ ), 6.06 (1H, s, CH-pyrazole), 7.23-7.42 (m, 5H, H-Ar), 12.06 (s, 1H, NH-triazole), 12.79 (s, 1H, NH-pyrazole);  $^{13}\text{C}$  NMR: (75MHz,  $\text{DMSO-}d_6$ ,  $\delta(\text{ppm})$ ): 10.58, 104.06, 128.47, 128.77, 129.28, 134.50, 139.44, 142.52, 146.02, 154.97. ESI-MS:  $m/z = 258.2$   $[\text{M}+\text{H}]^+$ .

**4-phenyl-5-(5-phenyl-1H-pyrazol-3-yl)-2,4-dihydro-3H-1,2,4-triazol-3-one (M83):**

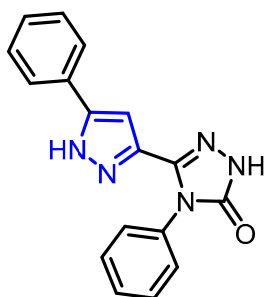

Yield 82% (solid); m.p: 277-279 °C; FT-IR (ATR,  $\nu(\text{cm}^{-1})$ ) : 3169-3389 (NH), 1655 (C=O);  $^1\text{H}$  NMR: (300MHz,  $\text{DMSO}-d_6$ ,  $\delta(\text{ppm})$ ) : 6.66 (1H, s, CH-pyrazole), 7.29-7.6 (m, 5H, H-Ar), 11.98 (s, 1H, NH-triazole), 12.66 (s, 1H, NH-pyrazole); ESI-MS:  $m/z = 304.1$   $[\text{M}+\text{H}]^+$ .

**5-(5-methyl-1H-pyrazol-3-yl)-1,3,4-oxadiazole-2-thiol (M86):**

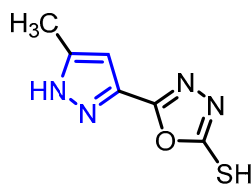

Yield 68% (solid); m.p: 352-354 °C; FT-IR (ATR,  $\nu(\text{cm}^{-1})$ ) : 3220 (NH), 2720 (SH), 1637 (C=O);  $^1\text{H}$  NMR: (300MHz,  $\text{DMSO}-d_6$ ,  $\delta(\text{ppm})$ ) : 2.27 (s, 3H,  $\text{CH}_3$ ), 6.54 (1H, s, CH-pyrazole), 13.34 (s, 1H, NH-pyrazole), 14.62 (s, 1H, SH) ;  $^{13}\text{C}$  NMR: (75MHz,  $\text{DMSO}-d_6$ ,  $\delta(\text{ppm})$ ): 14.02, 104.14, 134.16, 149.91, 155.48, 179.26. ESI-MS:  $m/z = 183.2$   $[\text{M}+\text{H}]^+$ .

**References**

- [1]. K. Karrouchi, S. Fettach, S. Radi, E. bekkaye Yousfi, J. Taoufik, Y.N. Mabkhot, S. Alterary, M.E.A.F. and M. Ansar, Synthesis, Characterization, Free-radical Scavenging Capacity and Antioxidant Activity of Novel Series of Hydrazone, 1,3,4-oxadiazole and 1,2,4- triazole Derived from 3,5-dimethyl-1H-pyrazole, Lett. Drug Des. Discov. 16 (2019) 712–720.  
<https://doi.org/http://dx.doi.org/10.2174/1570180815666180516103050>.
- [2]. K. Karrouchi, L. Chemlal, J. Taoufik, Y. Cherrah, S. Radi, M. El Abbes Faouzi, M. Ansar, Synthesis, antioxidant and analgesic activities of Schiff bases of 4-amino-1,2,4-triazole derivatives containing a pyrazole moiety, Ann. Pharm. Françaises. 74 (2016) 431–438. <https://doi.org/https://doi.org/10.1016/j.pharma.2016.03.005>.
- [3]. R.R. Pillai, K. Karrouchi, S. Fettach, S. Armaković, S.J. Armaković, Y. Brik, J. Taoufik, S. Radi, M. El Abbes Faouzi, M. Ansar, Synthesis, spectroscopic characterization, reactive properties by DFT calculations, molecular dynamics simulations and biological evaluation of Schiff bases tethered 1,2,4-triazole and pyrazole rings, J. Mol. Struct. 1177 (2019) 47–54.  
<https://doi.org/https://doi.org/10.1016/j.molstruc.2018.09.037>.
- [4]. K. Karrouchi, E.B. Yousfi, N.K. Sebbar, Y. Ramli, J. Taoufik, Y. Ouzidan, M. Ansar, Y.N. Mabkhot, H.A. Ghabbour, S. Radi, New Pyrazole-Hydrazone Derivatives: X-ray Analysis, Molecular Structure Investigation via Density Functional Theory (DFT) and

Their High In-Situ Catecholase Activity, *Int. J. Mol. Sci.* 18 (2017).  
<https://doi.org/10.3390/ijms18112215>.

- [5]. K. Karrouchi, S.A. Brandán, Y. Sert, H. El-marzouqi, S. Radi, M. Ferbinteanu, M.E.A. Faouzi, Y. Garcia, M. Ansar, Synthesis, X-ray structure, vibrational spectroscopy, DFT, biological evaluation and molecular docking studies of (E)-N'-(4-(dimethylamino)benzylidene)-5-methyl-1H-pyrazole-3-carbohydrazide, *J. Mol. Struct.* 1219 (2020) 128541. <https://doi.org/https://doi.org/10.1016/j.molstruc.2020.128541>.
- [6]. K. Karrouchi, S.A. Brandán, Y. Sert, M. El Karbane, S. Radi, M. Ferbinteanu, Y. Garcia, M. Ansar, Synthesis, structural, molecular docking and spectroscopic studies of (E)-N'-(4-methoxybenzylidene)-5-methyl-1H-pyrazole-3-carbohydrazide, *J. Mol. Struct.* 1225 (2021) 129072. <https://doi.org/https://doi.org/10.1016/j.molstruc.2020.129072>.
- [7]. K. Karrouchi, S.A. Brandán, M. Hassan, K. Bougrin, S. Radi, M. Ferbinteanu, Y. Garcia, M. Ansar, Synthesis, X-ray, spectroscopy, molecular docking and DFT calculations of (E)-N'-(2,4-dichlorobenzylidene)-5-phenyl-1H-pyrazole-3-carbohydrazide, *J. Mol. Struct.* 1228 (2021) 129714. <https://doi.org/https://doi.org/10.1016/j.molstruc.2020.129714>.
- [8]. K. Karrouchi, M. Ansar, S. Radi, M. Saadi, L. El Ammari. Crystal structure of N'-diphenylmethylidene-5-methyl-1H-pyrazole-3-carbohydrazide. *Acta Cryst E.* 71 (2015) o890-o891. doi: 10.1107/S2056989015020071.
- [9]. K. Karrouchi, S. Radi, J. Taoufik, H. A. Ghabbour, Y. N. Mabkhot. Crystal structure of N'-(4-(dimethylamino)benzylidene)-5-phenyl-1H-pyrazole-3-carbohydrazide, C<sub>19</sub>H<sub>19</sub>N<sub>5</sub>O. *Z. Kristallogr. NCS.* 231 (2016) 883-886. <https://doi.org/10.1515/ncrs-2015-0303>.
- [10]. K. Karrouchi, S. Radi, J. Taoufik, H. A. Ghabbour, Y. N. Mabkhot. Crystal structure of N'-(4-methoxybenzylidene)-5-phenyl-1H-pyrazole-3-carbohydrazide, C<sub>18</sub>H<sub>16</sub>N<sub>4</sub>O<sub>2</sub>. *Z. Kristallogr. NCS.* 231 (2016) 835-837. <https://doi.org/10.1515/ncrs-2015-0286>.
- [11]. K. Karrouchi, S. Radi, J. Taoufik, H. A. Ghabbour, Y. N. Mabkhot. Crystal structure of N'-(4-nitrobenzylidene)-5-phenyl-1H-pyrazole-3-carbohydrazide, C<sub>17</sub>H<sub>13</sub>N<sub>5</sub>O<sub>3</sub>. *Z. Kristallogr. NCS.* 231 (2016) 839-841. <https://doi.org/10.1515/ncrs-2015-0287>.
- [12]. Karrouchi, K., Fettach, S., Tüzün, B., Radi, S., Alharthi, A. I., Ghabbour, H. A., Mabkhot, Y.N, Faouzi, M.E.A., Ansar, M., Garcia, Y. (2021). Synthesis, crystal structure, DFT,  $\alpha$ -glucosidase and  $\alpha$ -amylase inhibition and molecular docking studies



of (E)-N'-(4-chlorobenzylidene)-5-phenyl-1H-pyrazole-3-carbohydrazide, J. Mol. Struct., 1245 (2021)131067. <https://doi.org/10.1016/j.molstruc.2021.131067>.
